# Supplementary material
Source: publisher figshare collection journal article supplement (https://acs.figshare.com/ndownloader/files/26231557)
Supplement: Supplementary file 1 [file 26231557]

## Sheet: Contents
Supplementary File 1
Supporting Information for
Comprehensive quantification of CML modified peptides in human plasma
Arvind M. Korwar1, Qibin Zhang1*
1. Center for Translational Biomedical Research, University of North Carolina at Greensboro, North Carolina Research Campus, Kannapolis, NC 28081, USA
*Corresponding author: Dr. Qibin Zhang, UNCG Center for Translational Biomedical Research, 600 Laureate Way, 2203, Kannapolis, NC 28081
Email: q_zhang2@uncg.edu
Table S1. Plasma sample description.
Table S2. Synthetic peptides used for trypsin resistantance evaluation.
Table S3. CML peptides quantified from good and poor glycemic control plasma samples.
Table S4. Comparison of CML modification sites in human serum albumin reported in this work and the literature.
Table S5. CML peptide signature ions detected in MS2 spectra
Table S6. Global proteomics data of the good and poor glycemic control plasma samples.
Table S7. GO annotation of CML proteins.

## Sheet: Table S1
Sample ID	Group	HbA1c	AgeAtBloodDraw	Gender
G01	Good glycemic control	7.1	47	Female
G02	Good glycemic control	6	59	Female
G03	Good glycemic control	6.5	33	Male
G04	Good glycemic control	6.5	33	Male
G05	Good glycemic control	6.7	39	Male
G06	Good glycemic control	5.9	56	Female
G07	Good glycemic control	6.5	37	Female
G08	Good glycemic control	7.2	62	Female
G09	Good glycemic control	6	35	Female
G10	Good glycemic control	6.7	54	Female
G11	Good glycemic control	6.6	59	Male
G12	Good glycemic control	7	48	Female
G13	Good glycemic control	6.6	60	Female
G14	Good glycemic control	5.9	39	Male
G15	Good glycemic control	5.4	56	Female
G16	Good glycemic control	6.5	37	Female
G17	Good glycemic control	7	63	Female
G18	Good glycemic control	5.7	36	Female
G19	Good glycemic control	6.4	55	Female
G20	Good glycemic control	6.6	59	Male
B01	Poor glycemic control	11.5	57	Female
B02	Poor glycemic control	9.1	41	Female
B03	Poor glycemic control	9.8	37	Male
B04	Poor glycemic control	10.5	52	Female
B05	Poor glycemic control	9.7	46	Female
B06	Poor glycemic control	10	66	Female
B07	Poor glycemic control	9.1	58	Male
B08	Poor glycemic control	9.6	53	Female
B09	Poor glycemic control	9.3	32	Female
B10	Poor glycemic control	9.5	36	Male
B11	Poor glycemic control	10.2	58	Female
B12	Poor glycemic control	10	41	Female
B13	Poor glycemic control	9	38	Male
B14	Poor glycemic control	9.8	52	Female
B15	Poor glycemic control	9.4	46	Female
B16	Poor glycemic control	7.5	66	Female
B17	Poor glycemic control	9.7	59	Male
B18	Poor glycemic control	9	54	Female
B19	Poor glycemic control	9.2	33	Female
B20	Poor glycemic control	8.2	36	Male

## Sheet: Table S2
				Without Trypsin	With Trypsin
Standard peptides	m/z	Charge state	Replicate	Precursor area	Precursor area	Ratios	Average of Ratios
KVPQVSTPTLVEVSR	854.48	2	1	75538742690	67718166688	0.896469	0.971253
			2	92901983022	96254764738	1.03609
			3	90747309972	89041346912	0.981201
KQTALVELVK	597.86	2	1	202260657195	210355006179	1.04002	1.00827
			2	222641930455	220927699543	0.992301
			3	215335895319	213718672013	0.99249
DSSLCKLCMGSGLNLCEPNNK	822.02	3	1	12840514442	11444866900	0.891309	0.928019
			2	9848515539	9501139790	0.964728
Note:
CML modified Lysine- K
Carbamidomethylated cysteine- C
Heavy isotope labeling- K, R

## Sheet: Table S3
Accession	Protein	Gene name	CML Peptide sequence	Site of modification	Mass [m/z]	Charge State	CML Modification	Normalized abundance B1	Normalized abundance B2	Normalized abundance B3	Normalized abundance B4	Normalized abundance B5	Normalized abundance B6	Normalized abundance B7	Normalized abundance B8	Normalized abundance B9	Normalized abundance B10	Normalized abundance B11	Normalized abundance B12	Normalized abundance B13	Normalized abundance B14	Normalized abundance B15	Normalized abundance B16	Normalized abundance B17	Normalized abundance B18	Normalized abundance B19	Normalized abundance B20	Normalized abundance G1	Normalized abundance G2	Normalized abundance G3	Normalized abundance G4	Normalized abundance G5	Normalized abundance G6	Normalized abundance G7	Normalized abundance G8	Normalized abundance G9	Normalized abundance G10	Normalized abundance G11	Normalized abundance G12	Normalized abundance G13	Normalized abundance G14	Normalized abundance G15	Normalized abundance G16	Normalized abundance G17	Normalized abundance G18	Normalized abundance G19	Normalized abundance G20		Average Good control
P00738	Haptoglobin	HP	AVGDKLPECEAVCGKPK	K82	639.313	3	AVGDK[+58.005]LPEC[+57.02]EAVC[+57.02]GKPK (light)	0.633253	0.480901	0.606497	0.530599	0.646889	0.708561	0.511974	0.695666	0.676334	0.57428	1.2671	0.684045	0.518316	1.13849	1.27872	0.958879	0.57906	0.669404	0.638733	0.661897	0.729745	0.776608	0.347832	0.367968	0.482771	0.583167	0.220099	0.188577	0.221428	0.223628	0.219478	0.343411	0.193129	0.169608	0.247258	0.504974	0.0304544	0.0638829	0.607137	0.566687		0.354392
P00739	Haptoglobin-related protein	HPR	VMPICLPSKNYAEVGR	K212	631.318	3	VMPIC[+57.02]LPSK[+58.005]NYAEVGR (light)	0.186176	0.149134	0.199738	0.255828	0.215765	0.176155	0.157063	0.24488	0.22242	0.219828	0.489607	0.376739	0.230088	0.293098	0.286995	0.341534	0.192747	0.226747	0.151541	0.189172	0.389513	0.220768	0.0991583	0.122007	0.153888	0.183162	0.0742821	0.0517692	0.0740064	0.0717592	0.0844786	0.111278	0.0589582	0.0604982	0.124596	0.175142	0.00456335	0.0205772	0.199466	0.149235		0.121455
P01834	Immunoglobulin kappa constant	IGKC	VDNALQSGNSQESVTEQDSKDSTYSLSSTLTLSK	K62	736.349	5	VDNALQSGNSQESVTEQDSK[+58.005]DSTYSLSSTLTLSK (light)	0.250731	0.108893	0.09113	0.0860287	0.114554	0.132336	0.112554	0.115123	0.152232	0.143673	0.147067	0.11394	0.157871	0.121228	0.110726	0.0935189	0.119181	0.153908	0.133466	0.136022	0.116847	0.0858001	0.0534558	0.0733027	0.0709718	0.0571394	0.0737952	0.0674526	0.0385417	0.0502203	0.0546486	0.0630911	0.0734696	0.0654249	0.0532004	0.0569254	0.0692754	0.0770807	0.0242034	0.115554		0.06702
P02768	Serum albumin	ALB	CASLQKFGER	K229	418.536	3	C[+57.02]ASLQK[+58.005]FGER (light)	0.833958	0.161613	0.248409	0.194741	0.163074	0.192474	0.200799	0.223069	0.207056	0.186901	0.443251	0.250234	0.185647	0.166408	0.135905	0.134161	0.30058	0.109425	0.353251	0.170752	0.21668	0.147103	0.126894	0.0770203	0.133286	0.152485	0.19482	0.211889	0.142349	0.209666	0.121532	0.159777	0.148894	0.0949388	0.122174	0.137604	0.258998	0.207368	0.105801	0.175967		0.157262
P01857	Immunoglobulin heavy constant gamma 1	IGHG1	GPSVFPLAPSSKSTSGGTAALGCLVK	K16	849.776	3	GPSVFPLAPSSK[+58.005]STSGGTAALGC[+57.02]LVK (light)	0.525177	0.434871	0.494888	0.510705	0.524548	0.551933	0.385889	0.625157	0.584043	0.514263	0.890864	0.476929	0.390703	0.735112	0.629439	0.590118	0.422831	0.395285	0.64231	0.601312	0.675929	0.662083	0.33833	0.335396	0.447872	0.435473	0.386713	0.405215	0.322914	0.332188	0.202121	0.34148	0.345327	0.235406	0.231889	0.343692	0.383336	0.504451	0.224276	0.536157		0.384512
P01871	Immunoglobulin heavy constant mu	IGHM	EGKQVGSGVTTDQVQAEAK	K153	663.996	3	EGK[+58.005]QVGSGVTTDQVQAEAK (light)	0.184299	0.198019	0.258158	0.225777	0.188152	0.206969	0.201208	0.263898	0.264381	0.271974	0.336053	0.279181	0.149057	0.333314	0.278076	0.247132	0.173294	0.167629	0.31468	0.236719	0.20548	0.257441	0.137798	0.180123	0.156438	0.170533	0.174231	0.17301	0.151661	0.155138	0.119394	0.152315	0.163415	0.140379	0.14007	0.153086	0.197102	0.208937	0.167956	0.22872		0.171661
P0DJD2	Apolipoprotein A-II	APOA2	VKSPELQAEAK	K53	629.338	2	VK[+58.005]SPELQAEAK (light)	1.11797	0.687846	0.374451	0.295025	0.452563	0.654637	0.541323	0.567012	0.65537	0.614857	0.183602	0.229706	0.404272	0.783461	0.254752	0.380665	0.525233	0.483415	0.346757	0.719232	0.476477	0.587471	0.386194	0.358385	0.371223	0.304949	0.388646	0.24464	0.49048	0.510249	0.378322	0.473049	0.346817	0.229019	0.176084	0.297673	0.336668	0.194365	0.570593	0.285344		0.370332
P02787	Serotransferrin	TF	KCSTSSLLEACTFR	K683	573.268	3	K[+58.005]C[+57.02]STSSLLEAC[+57.02]TFR (light)	0.172907	0.0986077	0.180666	0.179652	0.0980493	0.0805013	0.109625	0.199151	0.106121	0.159161	0.359161	0.132093	0.156646	0.184502	0.117164	0.0994686	0.0814431	0.0698518	0.133033	0.108336	0.114033	0.103836	0.0742391	0.0835228	0.106513	0.100815	0.0907427	0.0988129	0.090654	0.0960824	0.121648	0.101343	0.123611	0.120166	0.0876176	0.111848	0.112366	0.145979	0.113745	0.127034		0.10623
P02768	Serum albumin	ALB	KVPQVSTPTLVEVSR	K438	566.653	3	K[+58.005]VPQVSTPTLVEVSR (light)	0.212337	0.0942713	0.119677	0.113524	0.0891736	0.094194	0.0936692	0.126915	0.113621	0.133856	0.182782	0.141385	0.0918088	0.0921721	0.102809	0.0967571	0.14517	0.0981205	0.150421	0.0984474	0.131961	0.10517	0.0793442	0.0631665	0.0895572	0.0906094	0.091439	0.0969551	0.0839497	0.10406	0.0755735	0.0966912	0.0950288	0.0826037	0.0917808	0.102148	0.0990706	0.129359	0.0804317	0.112174		0.0950537
P01023	Alpha-2-macroglobulin	A2M	KYSDASDCHGEDSQAFCEK	K271	764.632	3	K[+58.005]YSDASDC[+57.02]HGEDSQAFC[+57.02]EK (light)	0.129842	0.0831671	0.0660076	0.0559408	0.171965	0.186494	0.0426976	0.0515913	0.0914152	0.0679883	0.0746154	0.0290122	0.0206703	0.0865076	0.0821884	0.0465584	0.118291	0.0992971	0.0949639	0.0772067	0.05796	0.10618	0.0853914	0.0822653	0.0734726	0.0641715	0.0630402	0.0686416	0.0739529	0.0954795	0.0534085	0.0617775	0.0693859	0.0376341	0.0549894	0.0906475	0.0705324	0.0484487	0.0393869	0.0852667		0.0691016
P02768	Serum albumin	ALB	AFKAWAVAR	K236	539.296	2	AFK[+58.005]AWAVAR (light)	0.0604975	0.00883613	0.0158382	0.0171176	0.0117817	0.0123063	0.00919845	0.0118782	0.013352	0.0184228	0.0229657	0.0267464	0.0190747	0.0128219	0.00723499	0.00838987	0.0139538	0.00979621	0.0169748	0.00981544	0.0292497	0.0114507	0.0101449	0.00693794	0.0104226	0.0113392	0.0106557	0.0110522	0.00955164	0.0123703	0.0192236	0.00960964	0.0126653	0.0147345	0.0157083	0.0117551	0.0168568	0.0242874	0.0072467	0.0183048		0.0136784
P02768	Serum albumin	ALB	AEFAEVSKLVTDLTK	K257	570.305	3	AEFAEVSK[+58.005]LVTDLTK (light)	0.108469	0.022389	0.0330366	0.0340119	0.0256856	0.045085	0.0194981	0.0227472	0.0226681	0.0476047	0.0475342	0.0338066	0.0254605	0.0257574	0.0175783	0.0174205	0.0357384	0.0287685	0.0269224	0.0253439	0.0362149	0.0184628	0.0193761	0.0206784	0.0235769	0.0297431	0.0219024	0.0259442	0.0181289	0.032487	0.0274064	0.0210033	0.0247337	0.0229782	0.0349388	0.0237737	0.0406338	0.0467175	0.0240489	0.0494962		0.0281123
P02675	Fibrinogen beta chain	FGB	KGGETSEMYLIQPDSSVKPYR	K247	815.065	3	K[+58.005]GGETSEMYLIQPDSSVKPYR (light)	0.413254	0.28151	0.280357	0.404564	0.432026	0.257816	0.212629	0.228412	0.308703	0.432458	0.287492	0.457989	0.285333	0.127554	0.345402	0.242868	0.201261	0.194295	0.293603	0.241953	0.57589	0.104987	0.21156	0.174534	0.222182	0.25128	0.22229	0.287546	0.256795	0.20515	0.307697	0.189496	0.186417	0.410393	0.344164	0.135788	0.181592	0.307398	0.0705086	0.367296		0.250648
P02652	Apolipoprotein A-II	APOA2	SKEQLTPLIK	K69	607.853	2	SK[+58.005]EQLTPLIK (light)	0.170363	0.0929882	0.106457	0.153373	0.101719	0.0958656	0.0737242	0.12984	0.124221	0.157082	0.263602	0.160069	0.146024	0.122858	0.0896655	0.0856769	0.072392	0.0838278	0.114557	0.11812	0.195922	0.10943	0.0823763	0.064697	0.0730036	0.0784366	0.0897158	0.0782971	0.0971976	0.0750492	0.140045	0.134038	0.102454	0.123404	0.087513	0.0933288	0.0920016	0.167777	0.0838081	0.122396		0.104545
P01876	Immunoglobulin heavy constant alpha 1	IGHA1	TFTCTAAYPESKTPLTATLSK	K212	782.723	3	TFTC[+57.02]TAAYPESK[+58.005]TPLTATLSK (light)	0.0861662	0.0695009	0.074467	0.0920263	0.0696269	0.0918147	0.0782581	0.107668	0.161602	0.205345	0.120516	0.124085	0.0512997	0.0782144	0.0713818	0.0761584	0.0948421	0.102518	0.0682729	0.0522579	0.173389	0.11028	0.039018	0.0510792	0.0497076	0.0447717	0.14859	0.183937	0.133245	0.166957	0.0783224	0.0460386	0.0236719	0.0168181	0.0670413	0.0557829	0.0721971	0.0789594	0.068341	0.0798575		0.0844002
P02647	Apolipoprotein A-I	APOA1	VKDLATVYVDVLK	K36	507.624	3	VK[+58.005]DLATVYVDVLK (light)	1.93244	0.980725	0.520043	0.723153	0.766189	0.519691	0.633924	0.621638	0.645997	0.865314	1.16678	0.914172	0.487615	0.81556	0.759831	0.515197	0.554302	0.599819	0.938984	0.639353	0.716619	0.73776	0.630343	0.657775	0.506587	0.479705	0.639615	0.634588	0.569299	0.828411	0.7922	0.602729	0.953803	0.66103	0.743061	0.595777	0.90748	1.10171	0.541378	0.816537		0.70582
P02787	Serotransferrin	TF	NLNEKDYELLCLDGTR	K576	670.986	3	NLNEK[+58.005]DYELLC[+57.02]LDGTR (light)	0.707809	0.494982	0.914474	0.880892	0.502527	0.401746	0.461945	0.60511	0.540796	0.573004	1.33767	0.99758	0.644784	0.909732	0.646061	0.491402	0.39106	0.347047	0.780964	0.52681	0.83338	0.597973	0.311756	0.383481	0.505705	0.497908	0.517848	0.564545	0.421296	0.505146	0.651431	0.54871	0.739534	0.742969	0.674245	0.662591	0.645707	0.836052	0.590841	0.704744		0.596793
P02787	Serotransferrin	TF	KASYLDCIR	K61	592.292	2	K[+58.005]ASYLDC[+57.02]IR (light)	0.401964	0.286438	0.433852	0.461125	0.270152	0.299486	0.261585	0.296665	0.336978	0.331297	0.492929	0.364372	0.313643	0.552263	0.324639	0.260917	0.203465	0.195821	0.400886	0.312273	0.376375	0.330096	0.246654	0.180712	0.318807	0.313155	0.253977	0.242181	0.234459	0.24536	0.312935	0.294347	0.37242	0.399334	0.277191	0.332119	0.360876	0.378306	0.330025	0.430231		0.311478
P02768	Serum albumin	ALB	MPCAEDYLSVVLNQLCVLHEKTPVSDR	K489	808.643	4	MPC[+57.02]AEDYLSVVLNQLC[+57.02]VLHEK[+58.005]TPVSDR (light)	4.69918	0.405546	0.411944	0.771333	0.583694	0.853665	0.318558	0.327499	0.463176	0.597664	0.591009	0.372719	0.572617	1.16368	0.458444	0.41605	0.583214	0.46303	0.823905	0.570102	1.05593	0.73421	0.483207	0.337476	0.889292	1.09188	0.581198	0.767408	0.429272	0.714783	1.01125	0.301733	0.635212	0.781448	0.847495	0.381692	0.469146	0.590847	0.0668138	1.99454		0.708242
P02787	Serotransferrin	TF	CLKDGAGDVAFVK	K215	479.906	3	C[+57.02]LK[+58.005]DGAGDVAFVK (light)	0.00895153	0.00932261	0.0378137	0.0455948	0.00947653	0.00745944	0.00811961	0.0087236	0.00944383	0.0512065	0.0182003	0.0303179	0.0404515	0.0163361	0.0077528	0.00683166	0.00705042	0.00682915	0.0122947	0.00906824	0.0553719	0.0068719	0.00678973	0.00937863	0.0099564	0.00924009	0.010075	0.0111028	0.00801034	0.00998605	0.0252581	0.00878652	0.0131586	0.0387147	0.0330636	0.0125259	0.0128249	0.0188622	0.0127943	0.0139891		0.016338
P02787	Serotransferrin	TF	NTYEKYLGEEYVK	K668	565.27	3	NTYEK[+58.005]YLGEEYVK (light)	0.321217	0.247034	0.0515403	0.061895	0.285581	0.287234	0.0297255	0.0379307	0.347368	0.0546683	0.0707175	0.0552815	0.0274079	0.336968	0.273525	0.0279395	0.248307	0.218363	0.31256	0.229315	0.0529765	0.343091	0.278795	0.161076	0.263481	0.190869	0.207445	0.233513	0.0326313	0.306971	0.0367501	0.0331586	0.259689	0.0476436	0.0465881	0.039017	0.322848	0.0645068	0.0393689	0.323795		0.164211
P02787	Serotransferrin	TF	KDSGFQMNQLR	K122	461.222	3	K[+58.005]DSGFQMNQLR (light)	0.0723977	0.0577069	0.0856968	0.0926296	0.058799	0.0580424	0.0500438	0.0672172	0.0659744	0.0751522	0.102932	0.0773557	0.0631177	0.105628	0.0408667	0.0479198	0.0387643	0.0394155	0.0754462	0.0573378	0.0629969	0.0567249	0.0489561	0.0513672	0.0632323	0.0620658	0.05236	0.0507678	0.0511529	0.0509149	0.0665071	0.0551794	0.0755123	0.0733176	0.0650823	0.0655992	0.0740472	0.0801699	0.0506375	0.0882892		0.062244
P04217	Alpha-1B-glycoprotein	A1BG	SGLSTGWTQLSKLLELTGPK	K106	725.395	3	SGLSTGWTQLSK[+58.005]LLELTGPK (light)	0.0498436	0.0263502	0.0369628	0.0468835	0.0331899	0.0242715	0.0414007	0.0445823	0.0448229	0.0489299	0.0589692	0.0567359	0.0281287	0.0330785	0.0291014	0.0263427	0.0249061	0.0238057	0.0347614	0.0232724	0.0601359	0.0378485	0.0298097	0.0367644	0.0281984	0.0219586	0.0249083	0.0270074	0.0265699	0.0375421	0.0465547	0.0362445	0.0309604	0.0362294	0.0380687	0.0306666	0.0346289	0.0481545	0.025168	0.0382737		0.0347846
P02675	Fibrinogen beta chain	FGB	KWDPYKQGFGNVATNTDGK	K300	728.683	3	KWDPYK[+58.005]QGFGNVATNTDGK (light)	0.0250268	0.0266575	0.0360592	0.0363193	0.0295437	0.0282153	0.0244045	0.0329734	0.0329315	0.0368644	0.0340212	0.0237502	0.0230536	0.0371726	0.0264897	0.0227287	0.0230117	0.0244094	0.0335923	0.0325924	0.0426377	0.0241109	0.0210393	0.025711	0.025353	0.0265337	0.0307822	0.0338074	0.0282062	0.0282179	0.0373847	0.0298755	0.016936	0.0217374	0.0302664	0.023671	0.0227723	0.033907	0.0276246	0.0327481		0.0281661
P02768	Serum albumin	ALB	EQLKAVMDDFAAFVEK	K569	633.645	3	EQLK[+58.005]AVMDDFAAFVEK (light)	0.855665	0.37365	0.366546	0.500237	0.441908	0.35935	0.494027	0.51855	0.38623	0.528101	0.610964	0.654228	0.414262	0.505374	0.250403	0.484231	0.407009	0.356869	0.753767	0.386774	0.62481	0.394218	0.374711	0.364823	0.481726	0.242716	0.485294	0.481194	0.434998	0.537852	0.598557	0.452743	0.501744	0.463653	0.5869	0.602984	0.557889	0.550205	0.449222	0.188557		0.46874
P02790	Hemopexin	HPX	WKNFPSPVDAAFR	K91	531.6	3	WK[+58.005]NFPSPVDAAFR (light)	5.73467	5.42575	5.59087	5.90937	5.84662	5.90363	5.14367	6.6656	6.50231	7.47824	8.31078	7.37595	6.24223	7.02914	5.715	5.1006	6.87562	5.99696	7.81078	6.2722	10.3629	6.9485	5.26774	6.41488	6.5185	5.32884	6.41806	5.12335	5.07699	5.47743	5.25087	5.11147	7.11986	5.06536	6.15466	6.38148	6.65747	6.75004	5.14883	7.28155		6.19294
P02768	Serum albumin	ALB	LDELRDEGKASSAK	K214	526.265	3	LDELRDEGK[+58.005]ASSAK (light)	0.0956448	0.0478242	0.032703	0.0322489	0.0550791	0.0639524	0.0319518	0.0362848	0.0673644	0.058458	0.0298008	0.0353637	0.0316904	0.0524456	0.0608629	0.0359529	0.0592002	0.0545932	0.0473863	0.0414973	0.0614801	0.079054	0.0518998	0.0375406	0.0520885	0.0422762	0.0437164	0.0378303	0.0382093	0.0568835	0.0428972	0.0383953	0.038002	0.0224924	0.0396546	0.0529286	0.0601957	0.0379634	0.0422687	0.0797439		0.047776
P02787	Serotransferrin	TF	KSASDLTWDNLK	K453	718.357	2	K[+58.005]SASDLTWDNLK (light)	0.0307232	0.0339511	0.0486889	0.0613549	0.0310473	0.0280208	0.028477	0.035695	0.0391302	0.0490978	0.0706915	0.0947206	0.068909	0.0547941	0.0332461	0.0294752	0.0209619	0.0218394	0.0436764	0.032963	0.0997332	0.0328536	0.0249661	0.0282611	0.0323413	0.030409	0.0265716	0.0285537	0.0279041	0.0289106	0.0747112	0.0322398	0.0402418	0.0890653	0.0510593	0.0367346	0.0355651	0.0502323	0.0389938	0.0416043		0.0425476
P01023	Alpha-2-macroglobulin	A2M	IAQWQSFQLEGGLKQFSFPLSSEPFQGSYK	K188	873.933	4	IAQWQSFQLEGGLK[+58.005]QFSFPLSSEPFQGSYK (light)	3.50445	1.21404	1.00228	1.33088	1.13886	1.0665	0.954517	1.0648	0.894969	0.827586	1.68837	1.35408	0.827986	1.25159	1.21451	0.764156	0.719798	0.663365	1.32458	0.974192	1.37582	1.019	1.06058	0.847814	0.74331	1.03597	0.963332	0.952598	1.06896	1.2816	1.71918	0.978926	1.53951	1.28955	1.19413	1.00298	1.9192	1.68121	0.428151	1.6189		1.18604
P01859	Immunoglobulin heavy constant gamma 2	IGHG2	KCCVECPPCPAPPVAGPSVFLFPPKPK	K101	774.381	4	K[+58.005]C[+57.02]C[+57.02]VEC[+57.02]PPC[+57.02]PAPPVAGPSVFLFPPKPK (light)	0.103936	0.124755	0.433413	0.334962	0.401993	0.340654	0.206143	0.235795	0.46055	0.339152	0.231335	0.139187	0.142998	0.265113	0.339713	0.260551	0.199898	0.175041	0.330141	0.305184	0.398491	0.630449	0.169396	0.196578	0.226658	0.190036	0.193076	0.303629	0.239932	0.358614	0.41668	0.227695	0.226733	0.148246	0.319544	0.266292	0.284317	0.304545	0.0348722	0.332364		0.273407
P02768	Serum albumin	ALB	LKECCEKPLLEK	K300	535.606	3	LK[+58.005]EC[+57.02]C[+57.02]EKPLLEK (light)	9.48502	5.18762	1.95012	2.37321	6.1602	6.83692	2.76866	5.19619	7.6738	3.89239	5.24143	2.90806	2.58581	8.85913	8.77214	3.7922	7.43467	6.50417	9.32238	8.47097	4.63304	7.3016	6.25154	6.90788	9.09939	6.94609	6.04536	7.74147	6.53951	6.18754	3.66471	2.30049	6.29209	1.90605	2.15557	4.55991	9.28037	5.12635	5.81074	9.72243		5.92361
P02768	Serum albumin	ALB	VFDEFKPLVEEPQNLIK	K402	701.705	3	VFDEFK[+58.005]PLVEEPQNLIK (light)	22.194	25.5683	28.0906	28.9428	24.487	26.8377	24.1266	29.5994	29.7611	34.5315	33.1517	34.4348	21.7526	34.3138	30.7275	24.9296	31.3394	28.0409	35.3019	30.472	33.3932	32.1855	25.748	27.4085	32.4188	28.5184	27.8619	29.2208	25.1868	28.5404	26	25.1377	33.4413	27.8647	30.8013	34.9824	30.8639	33.8074	30.5168	31.1737		29.7536
P02768	Serum albumin	ALB	KQTALVELVK	K549	593.856	2	K[+58.005]QTALVELVK (light)	0.0660331	0.0340057	0.0395278	0.0512568	0.0456366	0.0465007	0.031596	0.0406024	0.0478477	0.0554908	0.0592456	0.0632522	0.0619424	0.0453594	0.0390733	0.0325193	0.0498479	0.0358476	0.0437351	0.0324291	0.0338166	0.0447679	0.0395992	0.0444902	0.0371721	0.0355859	0.0406839	0.0371985	0.0402102	0.0461502	0.0833973	0.0388088	0.0491467	0.063751	0.0542813	0.0603426	0.0534122	0.0467383	0.0390838	0.0605508		0.0474594
P02647	Apolipoprotein A-I	APOA1	AKPALEDLR	K232	535.796	2	AK[+58.005]PALEDLR (light)	7.06744	4.4812	3.07221	2.19727	3.89148	3.38533	3.07069	3.78096	3.42753	2.61061	3.60579	2.2027	1.66241	3.90945	3.02136	1.93302	2.48153	2.35795	4.36225	3.2875	3.01704	3.47833	3.21618	3.07329	2.58293	2.34145	3.07672	2.68452	3.08496	3.91661	3.62782	3.20652	5.04124	3.59615	2.33031	3.32088	4.97201	4.06257	3.88692	3.90137		3.42089
P02787	Serotransferrin	TF	YLGEEYVKAVGNLR	K676	556.958	3	YLGEEYVK[+58.005]AVGNLR (light)	0.131495	0.0813848	0.126518	0.137543	0.0977938	0.0835169	0.0836155	0.100572	0.101591	0.10575	0.184406	0.138078	0.0943335	0.160822	0.0549363	0.0674679	0.0543986	0.0526303	0.114565	0.0902457	0.117551	0.0889728	0.076888	0.0704937	0.10556	0.101194	0.0863651	0.100915	0.090679	0.0997797	0.103194	0.10744	0.131889	0.115861	0.111713	0.117544	0.125372	0.129513	0.112613	0.151802		0.107267
P02768	Serum albumin	ALB	FKDLGEENFK	K36	642.809	2	FK[+58.005]DLGEENFK (light)	13.1816	10.4885	11.1777	10.9541	12.2926	12.4793	9.46103	12.7606	13.072	13.5178	17.4659	10.8352	13.7862	15.3647	13.3647	10.3799	13.8877	12.1237	16.6651	13.7524	5.6067	13.7114	11.3086	12.3646	14.3781	13.5196	12.819	12.4654	11.7852	13.1689	16.3253	9.99897	15.3801	17.7658	11.7861	14.6604	14.7765	16.9742	12.9844	17.0825		13.4431
P02647	Apolipoprotein A-I	APOA1	KWQEEMELYR	K131	735.34	2	K[+58.005]WQEEMELYR (light)	0.0286388	0.0143149	0.00624244	0.0182931	0.01406	0.0125049	0.00974093	0.00917275	0.014798	0.0210975	0.0103101	0.0165936	0.0141852	0.0169442	0.0111474	0.00432347	0.0100423	0.011342	0.0186226	0.01638	0.0347092	0.0141875	0.0136124	0.0133734	0.00953504	0.0120598	0.0122657	0.0110844	0.0117005	0.0143264	0.0198242	0.0081367	0.0199178	0.0223349	0.017468	0.0107134	0.0161949	0.0133766	0.00227748	0.01846		0.0147779
P02768	Serum albumin	ALB	CCAAADPHECYAKVFDEFKPLVEEPQNLIK	K396	924.427	4	C[+57.02]C[+57.02]AAADPHEC[+57.02]YAK[+58.005]VFDEFK[+58.005]PLVEEPQNLIK (light)	0.111444	0.0338748	0.022282	0.0304329	0.029574	0.0323263	0.0202465	0.019604	0.0262691	0.0160221	0.027716	0.0417605	0.0315438	0.0357784	0.016595	0.0177913	0.0348168	0.0290568	0.041096	0.0307887	0.0267519	0.0332581	0.02963	0.0274925	0.0407388	0.0400263	0.0374252	0.0421568	0.0172509	0.0350768	0.0624244	0.0192805	0.0447141	0.0233345	0.0462687	0.024944	0.047469	0.0310772	0.0052362	0.0547456		0.0344651
P0DOY2	Immunoglobulin lambda constant 2	IGLC2	ADSSPVKAGVETTTPSK	K50	578.292	3	ADSSPVK[+58.005]AGVETTTPSK (light)	0.152981	0.0921849	0.0556907	0.0532267	0.096626	0.109672	0.0863117	0.103923	0.136358	0.143796	0.0515396	0.0513536	0.018634	0.0682119	0.0858948	0.071528	0.102909	0.0945499	0.0537081	0.0405774	0.0670361	0.123165	0.0654965	0.0646942	0.086413	0.0725835	0.102299	0.0973841	0.137471	0.19017	0.0761003	0.0696973	0.0450402	0.0263855	0.0604346	0.0695555	0.100541	0.0694162	0.122595	0.14803		0.0897254
P02768	Serum albumin	ALB	VTKCCTESLVNR	K499	762.861	2	VTK[+58.005]C[+57.02]C[+57.02]TESLVNR (light)	0.135915	0.0905946	0.0653854	0.06399	0.111206	0.120446	0.102853	0.102541	0.116582	0.119403	0.0545024	0.0778167	0.062112	0.138007	0.0535172	0.0720065	0.0929103	0.0939492	0.131018	0.110459	0.113397	0.100895	0.095129	0.0969186	0.116683	0.116068	0.0944642	0.0874487	0.0984967	0.13268	0.0690058	0.0938699	0.121294	0.0689706	0.089501	0.103595	0.124382	0.0907402	0.128138	0.156654		0.104917
P02768	Serum albumin	ALB	YKAAFTECCQAADK	K186	860.869	2	YK[+58.005]AAFTEC[+57.02]C[+57.02]QAADK (light)	0.350178	0.259252	0.189176	0.134123	0.318166	0.309658	0.211037	0.323336	0.332073	0.235356	0.404516	0.169334	0.0732597	0.369931	0.18976	0.228741	0.313806	0.301598	0.390415	0.29262	0.222643	0.285292	0.275955	0.261989	0.337748	0.345138	0.334943	0.337464	0.292367	0.366877	0.167686	0.241356	0.423579	0.115166	0.179538	0.339293	0.467009	0.188394	0.2986	0.53508		0.300806
P0DOX8	Immunoglobulin lambda-1 light chain	IGL1	VTVLGQPKANPTVTLFPPSSEELQANK	K114	975.185	3	VTVLGQPK[+58.005]ANPTVTLFPPSSEELQANK (light)	0.818508	0.253905	0.258178	0.217201	0.36796	0.596843	0.230383	0.26689	0.342322	0.254783	0.400312	0.277719	0.178694	0.692943	0.573349	0.242578	0.47704	0.193296	0.791123	0.545406	0.363344	0.624076	0.50031	0.366018	0.623823	0.6799	0.439934	0.630434	0.209729	0.457472	0.259639	0.19895	0.677351	0.25139	0.244157	0.291766	0.778918	0.282615	0.199	0.868902		0.447386
P02768	Serum albumin	ALB	TCVADESAENCDKSLHTLFGDK	K88	639.531	4	TC[+57.02]VADESAENC[+57.02]DK[+58.005]SLHTLFGDK (light)	0.617778	0.528464	0.557393	0.51107	0.459938	0.529907	0.434325	0.570663	0.599817	0.716914	0.895218	0.58659	0.499982	0.674542	0.361249	0.478428	0.62235	0.557577	0.581854	0.457207	0.554563	0.562128	0.460023	0.458093	0.651893	0.630261	0.697906	0.632113	0.453548	0.637066	0.810141	0.530712	0.842378	0.540426	0.796104	0.664395	0.672192	0.689101	0.54647	0.927604		0.637856
P02768	Serum albumin	ALB	TYETTLEKCCAAADPHECYAK	K383	644.774	4	TYETTLEK[+58.005]C[+57.02]C[+57.02]AAADPHEC[+57.02]YAK (light)	1.01254	1.08528	1.46015	1.58643	1.25551	1.07744	1.19714	1.32141	1.2454	1.86072	1.47643	1.56111	1.15069	1.44629	0.831037	1.12213	1.29768	1.2959	1.65628	1.18997	1.09161	1.21184	1.06246	1.25723	1.45572	1.34984	1.41937	1.54869	1.39451	1.43493	1.51798	1.31413	1.53063	1.43032	1.86039	1.61395	1.87636	2.22562	1.39223	1.88259		1.49352
P02768	Serum albumin	ALB	QNCELFEQLGEYKFQNALLVR	K426	886.439	3	QNC[+57.02]ELFEQLGEYK[+58.005]FQNALLVR (light)	3.54965	1.41739	1.11167	0.790635	1.12467	0.983787	1.38674	0.880334	0.900942	1.29679	1.28747	0.844395	0.752268	1.5333	0.928731	1.0076	1.5357	1.19176	1.77362	1.10775	1.38588	1.31973	1.01092	1.23372	1.62846	1.54699	1.68811	1.74731	1.07994	1.7677	1.40234	1.01179	1.58871	1.24707	1.68231	1.5951	2.32047	1.64164	0.482773	2.22842		1.48047
P02768	Serum albumin	ALB	AAFTECCQAADKAACLLPK	K198	728.336	3	AAFTEC[+57.02]C[+57.02]QAADK[+58.005]AAC[+57.02]LLPK (light)	1.61323	1.2926	1.26426	1.302	1.42899	1.35846	1.05427	1.46266	1.43947	1.75874	1.99117	1.61798	1.36686	1.67646	0.984831	1.07301	1.52272	1.43212	1.83862	1.35848	2.24417	1.4628	1.25535	1.31993	1.56851	1.55877	1.63533	1.77917	1.38495	1.72069	1.68718	1.23603	2.05522	1.47364	1.61219	1.73389	2.15638	2.03722	1.59292	2.29972		1.6907
P02647	Apolipoprotein A-I	APOA1	VKDLATVYVDVLKDSGR	K36	484.765	4	VKDLATVYVDVLK[+58.005]DSGR (light)	0.132727	0.0831525	0.0466684	0.0562144	0.0653028	0.0425981	0.0552983	0.0638146	0.0543509	0.0617789	0.113563	0.0746216	0.0399145	0.0797066	0.0467216	0.0503815	0.0511974	0.0422571	0.0763227	0.0549162	0.0711428	0.0688801	0.061763	0.0595912	0.0365357	0.0407803	0.0609976	0.051641	0.0726127	0.0887692	0.0829956	0.0666306	0.131826	0.0917627	0.080496	0.0712141	0.129663	0.102518	0.0682101	0.0795858		0.0758808
P02768	Serum albumin	ALB	SHCIAEVENDEMPADLPSLAADFVESKDVCK	K337	884.398	4	SHC[+57.02]IAEVENDEMPADLPSLAADFVESK[+58.005]DVC[+57.02]K (light)	1.12325	1.05194	0.861863	0.828741	1.05842	0.820565	0.71326	0.725521	0.90318	0.99697	1.4234	0.898752	0.745224	1.18351	0.670814	0.796457	1.08987	0.830442	1.3357	0.992774	1.17901	1.18893	0.889892	0.884352	1.22473	1.13173	1.26868	1.52164	0.866407	1.32191	1.11193	0.772926	1.4706	1.02227	1.05532	1.09405	1.44693	1.06579	0.597072	1.7172		1.14157
P02768	Serum albumin	ALB	LVNEVTEFAKTCVADESAENCDK	K75	896.399	3	LVNEVTEFAK[+58.005]TC[+57.02]VADESAENC[+57.02]DK (light)	3.30814	2.09537	1.79391	1.63023	2.31774	2.02438	1.69303	1.93376	2.10755	2.31525	3.7358	2.45112	1.12586	2.74684	1.50213	1.89336	2.35338	2.18603	2.61358	2.18704	3.10513	2.41318	1.88449	2.13694	2.81318	2.47654	2.72681	3.10071	2.18539	2.98044	1.60957	1.87631	3.1743	2.17188	2.72002	2.69985	3.31036	3.169	2.64092	3.84259		2.65188
P02768	Serum albumin	ALB	LAKTYETTLEK	K375	677.859	2	LAK[+58.005]TYETTLEK (light)	0.452037	0.298806	0.305169	0.276113	0.317656	0.397805	0.333493	0.334279	0.372171	0.414964	0.181685	0.150725	0.168415	0.461352	0.23287	0.221616	0.391047	0.362557	0.408158	0.330797	0.455012	0.403027	0.292157	0.250449	0.404659	0.378268	0.376727	0.359766	0.28154	0.331515	0.301769	0.353325	0.470544	0.287343	0.315664	0.392715	0.580612	0.374827	0.540357	0.661964		0.390612
P02768	Serum albumin	ALB	ETYGEMADCCAKQEPER	K117	711.284	3	ETYGEMADC[+57.02]C[+57.02]AK[+58.005]QEPER (light)	0.188911	0.167312	0.167935	0.143114	0.192306	0.190735	0.135679	0.180789	0.178162	0.17234	0.227819	0.111267	0.0955385	0.200742	0.0905667	0.125371	0.167404	0.144902	0.203477	0.179383	0.0864936	0.173358	0.139513	0.167138	0.228251	0.207512	0.206063	0.209288	0.170711	0.222091	0.18732	0.153169	0.25961	0.17864	0.210313	0.215356	0.262415	0.242754	0.178729	0.318046		0.200839
P01857	Immunoglobulin heavy constant gamma 1	IGHG1	VSNKALPAPIEK	K207	662.877	2	VSNK[+58.005]ALPAPIEK (light)	0.0187944	0.0100065	0.0108832	0.0113191	0.0248421	0.0286035	0.026417	0.0357856	0.0352281	0.024912	0.0143498	0.0112081	0.00856563	0.0210473	0.0157062	0.0176305	0.0440756	0.0377272	0.0194948	0.015735	0.0273214	0.0251543	0.0250962	0.0215052	0.0264456	0.0262274	0.0263985	0.0252474	0.0383709	0.0458911	0.0197123	0.0242702	0.0271349	0.0143829	0.0211069	0.0362416	0.0331902	0.0234262	0.0266829	0.0316229		0.0272714
B9A064	Immunoglobulin lambda-like polypeptide 5	IGLL5	SYSCQVTHEGSTVEKTVAPTECS	K206	872.379	3	SYSC[+57.02]QVTHEGSTVEK[+58.005]TVAPTEC[+57.02]S (light)	0.0828952	0.0510305	0.038463	0.039676	0.0631961	0.0624636	0.0574272	0.0766315	0.0896498	0.106569	0.0631406	0.0540551	0.0264049	0.0473732	0.0585575	0.058808	0.0634386	0.0641971	0.0420548	0.0290177	0.0823907	0.0850185	0.050606	0.0567723	0.0567088	0.0561305	0.0952792	0.117512	0.120188	0.134414	0.0726505	0.0546869	0.0396067	0.0252882	0.0609628	0.0525696	0.0729358	0.0621615	0.081451	0.106068		0.0741701
A0M8Q6	Immunoglobulin lambda constant 7	IGLC7	QSNNKYAASSYLSLTPEQWK	K65	791.717	3	QSNNK[+58.005]YAASSYLSLTPEQWK (light)	0.0434299	0.0388784	0.0373506	0.0312353	0.0467325	0.0381092	0.0483527	0.0486377	0.052106	0.0525831	0.0430227	0.0273697	0.0153012	0.029207	0.0536711	0.0417755	0.0525288	0.0502844	0.0468716	0.0313787	0.0771299	0.060876	0.0357135	0.0485624	0.0474361	0.0441116	0.0580484	0.0699193	0.0773771	0.0902944	0.0428074	0.0385077	0.0363634	0.0112834	0.0492317	0.0388156	0.0624423	0.0468667	0.0518782	0.0741256		0.0530895
P01834	Immunoglobulin kappa constant	IGKC	DSTYSLSSTLTLSKADYEK	K76	723.014	3	DSTYSLSSTLTLSK[+58.005]ADYEK (light)	0.0166017	0.0137886	0.0158908	0.0220358	0.0508635	0.0374801	0.0239272	0.041249	0.0412764	0.04585	0.0309648	0.0104599	0.0123243	0.0290051	0.0253854	0.0233181	0.0405473	0.0341543	0.0406482	0.0323824	0.0342576	0.0347697	0.0272324	0.0341372	0.0451589	0.0407259	0.0348883	0.0392037	0.0496376	0.0794085	0.0255012	0.0310043	0.0260373	0.0129365	0.031407	0.0453277	0.0386092	0.0392657	0.0339251	0.0532489		0.0378341
P02768	Serum albumin	ALB	ADLAKYICENQDSISSK	K588	667.314	3	ADLAK[+58.005]YIC[+57.02]ENQDSISSK (light)	0.223234	0.167182	0.188077	0.26137	0.259622	0.213454	0.199658	0.228212	0.201099	0.239837	0.234541	0.194779	0.147145	0.247799	0.135967	0.147216	0.222454	0.181159	0.21209	0.223749	0.275035	0.220818	0.203101	0.180783	0.240863	0.262142	0.246089	0.244744	0.253831	0.274696	0.262216	0.22284	0.289238	0.224635	0.301305	0.261505	0.326014	0.405878	0.2501	0.370832		0.265833
P02647	Apolipoprotein A-I	APOA1	AKVQPYLDDFQK	K120	755.383	2	AK[+58.005]VQPYLDDFQK (light)	0.0208398	0.019963	0.0170557	0.0158469	0.0225287	0.0134029	0.0128206	0.0235304	0.0196465	0.014548	0.0300092	0.0364612	0.0253836	0.017067	0.0081864	0.0101911	0.0115739	0.0117835	0.0204215	0.0133076	0.0557724	0.0160244	0.0154901	0.0163028	0.0125974	0.0124727	0.0179041	0.0173316	0.0197518	0.0202576	0.0540759	0.0193974	0.0295525	0.0495514	0.0307594	0.0208172	0.0258645	0.0298926	0.0214071	0.0223027		0.0253763
P02768	Serum albumin	ALB	FPKAEFAEVSK	K249	655.835	2	FPK[+58.005]AEFAEVSK (light)	0.0723347	0.0554432	0.077748	0.083715	0.0677251	0.0922578	0.0646262	0.0747699	0.081558	0.0870856	0.0454406	0.0646457	0.122838	0.118612	0.0585064	0.0534658	0.0995727	0.100183	0.0951136	0.0843608	0.288524	0.113206	0.0659328	0.0583981	0.102195	0.104071	0.10036	0.10187	0.0469838	0.0721884	0.143671	0.0819978	0.123403	0.163752	0.108336	0.0913728	0.164951	0.0898074	0.151399	0.196622		0.118452
[truncated: 6 more columns]

## Sheet: Table S4
MCP 2015. Korwar et. al.		JPR 2015. Greifenhagen et. Al.		This study (sites in greens are reported in previous studies)
In-vitro glycated plasma sample	Diabetic plasma sample	In-vitro glycated plasma sample	Diabetic plasma sample	In-vitro glycated plasma sample	Diabetic plasma sample
K88	K88	K36	K396	Not reported	K36
K160	K160	K106	K88		K75
K161	K161	K130			K88
K183	K183	K214			K117
K229	K426	K223			K186
K236	K438	K375			K198
K337	K490	K438			K214
K402	K549	K499			K229
K426					K236
K437					K249
K438					K257
K490					K300
K549					K337
					K375
					K383
					K396
					K402
					K426
					K438
					K489
					K499
					K549
					K569
					K588

## Sheet: Table S5
CML Peptide sequence	Precursor m/z	Precursor charge state	Signature ion m/z 142.1	Signature ion m/z 187.1
AAFTECCQAADKAACLLPK	728.336	3	No	Yes
ADLAKYICENQDSISSK	667.314	3	Yes	Yes
ADSSPVKAGVETTTPSK	578.292	3	No	Yes
AEFAEVSKLVTDLTK	570.305	3	Yes	Yes
AFKAWAVAR	539.296	2	Yes	Yes
AKPALEDLR	535.796	2	Yes	Yes
AKVQPYLDDFQK	755.383	2	No	Yes
AVGDKLPECEAVCGKPK	639.313	3	Yes	Yes
CASLQKFGER	418.536	3	Yes	Yes
CCAAADPHECYAKVFDEFKPLVEEPQNLIK	924.427	4	No	Yes
CLKDGAGDVAFVK	479.906	3	No	Yes
DSTYSLSSTLTLSKADYEK	723.014	3	No	Yes
EGKQVGSGVTTDQVQAEAK	664.002	3	No	Yes
EQLKAVMDDFAAFVEK	633.645	3	Yes	Yes
ETYGEMADCCAKQEPER	711.284	3	No	Yes
FKDLGEENFK	642.809	2	Yes	Yes
FPKAEFAEVSK	655.835	2	Yes	Yes
GPSVFPLAPSSKSTSGGTAALGCLVK	849.776	3	No	Yes
IAQWQSFQLEGGLKQFSFPLSSEPFQGSYK	873.933	4	No	Yes
KASYLDCIR	592.292	2	Yes	Yes
KCCVECPPCPAPPVAGPSVFLFPPKPK	774.381	4	Yes	Yes
KCSTSSLLEACTFR	573.268	3	No	Yes
KDSGFQMNQLR	461.222	3	Yes	No
KGGETSEMYLIQPDSSVKPYR	815.065	3	No	Yes
KQTALVELVK	593.856	2	Yes	Yes
KSASDLTWDNLK	718.357	2	Yes	Yes
KVPQVSTPTLVEVSR	566.653	3	Yes	Yes
KWDPYKQGFGNVATNTDGK	728.683	3	No	Yes
KWQEEMELYR	735.34	2	Yes	No
KYSDASDCHGEDSQAFCEK	764.632	3	Yes	No
LAKTYETTLEK	677.859	2	No	Yes
LDELRDEGKASSAK	526.265	3	Yes	Yes
LKECCEKPLLEK	535.606	3	Yes	Yes
LVNEVTEFAKTCVADESAENCDK	896.399	3	No	Yes
MPCAEDYLSVVLNQLCVLHEKTPVSDR	808.643	4	No	Yes
NLNEKDYELLCLDGTR	670.986	3	No	Yes
NTYEKYLGEEYVK	565.27	3	No	Yes
QNCELFEQLGEYKFQNALLVR	886.439	3	No	Yes
QSNNKYAASSYLSLTPEQWK	791.717	3	No	Yes
SGLSTGWTQLSKLLELTGPK	725.401	3	No	Yes
SHCIAEVENDEMPADLPSLAADFVESKDVCK	884.398	4	No	Yes
SKEQLTPLIK	607.853	2	No	Yes
SYSCQVTHEGSTVEKTVAPTECS	872.379	3	No	Yes
TCVADESAENCDKSLHTLFGDK	639.531	4	No	Yes
TFTCTAAYPESKTPLTATLSK	782.723	3	No	Yes
TYETTLEKCCAAADPHECYAK	644.774	4	No	Yes
VDNALQSGNSQESVTEQDSKDSTYSLSSTLTLSK	1226.59	3	No	No
VFDEFKPLVEEPQNLIK	701.705	3	No	Yes
VKDLATVYVDVLK	507.624	3	No	Yes
VKDLATVYVDVLKDSGR	1936.04	3	Yes	Yes
VKSPELQAEAK	629.34	2	No	Yes
VMPICLPSKNYAEVGR	631.318	3	No	Yes
VSNKALPAPIEK	662.877	2	No	Yes
VTKCCTESLVNR	762.861	2	No	Yes
VTVLGQPKANPTVTLFPPSSEELQANK	975.191	3	No	Yes
WKNFPSPVDAAFR	796.895	2	No	Yes
YKAAFTECCQAADK	860.869	2	Yes	Yes
YLGEEYVKAVGNLR	556.958	3	No	Yes

## Sheet: Table S6
Significant	LogPvalue	Difference	Symbol color	Symbol type	Symbol size	Show label	Accession	Description	Poor01	Poor02	Poor03	Poor04	Poor05	Poor06	Poor07	Poor08	Poor09	Poor10	Poor11	Poor12	Poor13	Poor14	Poor15	Poor16	Poor17	Poor18	Poor19	Poor20	Good01	Good02	Good03	Good04	Good05	Good06	Good07	Good08	Good09	Good10	Good11	Good12	Good13	Good14	Good15	Good16	Good17	Good18	Good19	Good20
+	4.48514	0.264649	Color2 [A=255, R=169, G=169, B=169]	1	4		P01024	Complement C3 OS=Homo sapiens OX=9606 GN=C3 PE=1 SV=2	7.28724	7.15628	7.00286	6.95437	7.0347	6.98139	6.98287	6.94549	7.03597	7.01082	7.21422	7.27737	7.50922	7.33524	7.28027	7.3165	7.02107	6.76517	6.99943	7.09675	6.95607	6.90626	6.76591	6.76824	6.86075	7.07889	7.01425	6.85293	6.68141	6.73706	6.79045	6.52741	6.85248	7.15787	6.80806	6.50619	7.1077	7.03449	6.76442	6.74344
+	3.96247	1.05015	Color2 [A=255, R=169, G=169, B=169]	1	4		P00738	Haptoglobin OS=Homo sapiens OX=9606 GN=HP PE=1 SV=1	7.26136	7.00175	7.22095	7.20854	7.15696	7.14131	6.97372	7.07935	7.14358	7.09298	7.98213	7.8608	7.93908	7.80536	7.93848	8.00492	7.2811	7.30363	6.79647	7.25274	7.34847	7.24746	6.77169	6.89137	6.69644	7.12708	6.18445	5.6384	6.13281	5.90878	6.39678	6.41213	5.79639	6.23099	7.02275	7.0923	3.21302	4.38628	7.13538	6.80932
+	2.5466	-0.364403	Color2 [A=255, R=169, G=169, B=169]	1	4		P01857	Immunoglobulin heavy constant gamma 1 OS=Homo sapiens OX=9606 GN=IGHG1 PE=1 SV=1	6.97808	6.66486	6.98201	6.89726	7.54033	7.57761	7.54056	7.50635	7.60813	7.47617	7.06062	7.16993	7.35472	7.22635	7.7402	7.57211	8.47931	8.15527	7.06496	7.0954	7.71854	7.6717	7.78469	7.69366	7.60654	7.831	7.7076	7.4923	8.17905	8.27422	7.82748	7.33609	7.66021	7.54824	8.26053	7.92865	7.92561	7.76153	7.29891	7.47176
+	4.24429	0.293367	Color2 [A=255, R=169, G=169, B=169]	1	4		P08603	Complement factor H OS=Homo sapiens OX=9606 GN=CFH PE=1 SV=4	4.46418	4.29622	3.9961	3.93204	4.2593	4.2067	4.21414	4.26325	3.99385	4.0522	4.49082	4.56946	4.69157	4.61522	4.41772	4.53655	4.10437	3.79978	4.27651	4.32671	3.97767	4.05494	4.22226	4.1001	3.97108	4.19419	3.78302	3.7662	3.90204	3.8631	4.24426	3.82791	4.01496	4.12355	4.06268	3.79169	4.07895	4.03492	3.78853	3.83731
+	2.38898	0.520339	Color2 [A=255, R=169, G=169, B=169]	1	4		P04003	C4b-binding protein alpha chain OS=Homo sapiens OX=9606 GN=C4BPA PE=1 SV=2	3.92477	3.5402	3.53561	3.18228	3.06825	3.01369	3.07873	3.31689	4.16554	3.12599	4.0091	3.7092	3.81503	5.22183	3.14382	3.683	3.23148	3.0632	2.8966	4.16391	2.95514	4.58246	3.22598	3.68289	3.03989	3.28102	2.57574	2.37225	3.09677	2.8512	2.83103	2.94298	2.77606	3.62681	2.8202	2.17014	2.92566	2.92026	3.02766	2.7782
+	3.1846	0.355496	Color2 [A=255, R=169, G=169, B=169]	1	4		P00751	Complement factor B OS=Homo sapiens OX=9606 GN=CFB PE=1 SV=2	3.86841	3.82007	3.48736	3.40859	3.7197	3.70715	3.60297	3.5677	3.87451	4.04208	3.33175	3.42437	3.70084	3.68002	3.53175	3.70213	3.66522	3.50383	3.51237	3.41738	3.62994	3.49624	3.9381	3.89719	3.28206	3.39836	3.38994	3.13922	2.38436	2.54588	3.0773	2.85456	3.3559	3.6002	3.19459	3.0307	3.50715	3.35038	3.16932	3.21691
+	2.46258	-0.652262	Color2 [A=255, R=169, G=169, B=169]	1	4		P01871	Immunoglobulin heavy constant mu OS=Homo sapiens OX=9606 GN=IGHM PE=1 SV=4	3.36347	2.83629	4.82713	4.83168	5.25162	5.16377	5.66548	5.64016	4.56401	4.65393	3.79669	3.83592	3.96552	3.78999	4.79309	4.57026	5.36038	5.10832	4.14236	4.05881	5.61861	5.74599	5.78985	5.72255	5.57189	5.49272	4.2725	4.14215	5.39911	5.37212	5.44907	4.94304	4.23864	4.28023	5.46737	5.08647	5.15179	5.02155	5.11936	5.37911
+	5.05338	0.292779	Color2 [A=255, R=169, G=169, B=169]	1	4		P01031	Complement C5 OS=Homo sapiens OX=9606 GN=C5 PE=1 SV=4	2.91881	2.56583	2.41658	2.42528	2.56238	2.4667	2.23518	2.27135	2.5302	2.4338	2.41715	2.41041	2.63063	2.37948	2.53642	2.64406	2.58016	2.35624	2.23924	2.41891	2.11027	1.83736	2.37578	2.52571	1.93588	2.28	2.34534	2.16282	2.08354	2.13798	2.31133	1.79558	2.33243	2.50903	2.29466	2.00268	2.16687	2.08986	2.04863	2.23747
+	4.49641	0.397518	Color2 [A=255, R=169, G=169, B=169]	1	4		P05546	Heparin cofactor 2 OS=Homo sapiens OX=9606 GN=SERPIND1 PE=1 SV=3	2.11622	1.90792	1.74153	1.72679	1.77762	1.60646	1.87273	1.81735	1.57038	1.49126	1.93941	2.02148	2.29957	2.14851	2.19271	2.28333	1.9458	1.87823	1.65103	1.95082	1.83154	1.83159	1.35817	1.45192	1.66179	1.92491	1.50082	1.152	0.928484	0.951504	1.69019	1.39739	1.52168	1.72032	1.86944	1.784	1.21058	1.24084	1.55692	1.40472
+	2.63504	0.40988	Color2 [A=255, R=169, G=169, B=169]	1	4		P07225	Vitamin K-dependent protein S OS=Homo sapiens OX=9606 GN=PROS1 PE=1 SV=1	1.42028	1.13725	0.925738	0.753057	1.14553	1.04839	0.77401	0.961813	1.63397	0.679439	1.49562	1.28199	1.25658	2.21851	0.992774	1.49106	0.515318	0.660214	0.804976	1.78497	0.589499	1.73121	0.86369	1.2578	0.820111	1.05526	0.552052	0.348678	0.816591	0.652739	0.484434	0.421892	0.620746	1.19021	0.558602	0.100508	0.662241	0.5738	0.816676	0.66715
+	3.79029	0.288284	Color2 [A=255, R=169, G=169, B=169]	1	4		P08697	Alpha-2-antiplasmin OS=Homo sapiens OX=9606 GN=SERPINF2 PE=1 SV=3	1.3422	1.18221	1.07101	1.03258	1.15382	1.2768	1.20922	0.935192	1.09101	0.941863	0.90099	1.03225	1.3687	1.17302	1.20166	1.30905	1.45354	1.31873	0.900343	1.18948	0.990163	0.933328	0.831775	0.934412	1.1698	1.32901	1.08669	0.986081	0.759251	0.836525	0.943392	0.0927525	0.951379	0.773824	0.875684	0.75058	1.0528	0.902751	0.680741	0.437022
+	3.36972	0.616974	Color2 [A=255, R=169, G=169, B=169]	1	4		P20851	C4b-binding protein beta chain OS=Homo sapiens OX=9606 GN=C4BPB PE=1 SV=1	0.183192	0.0693712	-0.193896	-0.695268	-0.623729	-0.44032	-0.58843	-0.227659	0.575541	-0.348794	-0.00840855	-0.126956	-0.111412	1.10542	-0.44468	-0.00656033	-0.784451	-0.944991	-0.595818	0.421444	-1.14103	0.488402	-0.199502	0.119184	-0.802022	-0.510994	-1.37524	-1.44904	-0.513575	-0.919586	-1.14559	-1.08122	-1.11103	-0.355996	-1.04317	-1.41546	-0.998182	-1.01066	-0.747308	-0.913856
+	5.00683	0.370215	Color2 [A=255, R=169, G=169, B=169]	1	4		P06681	Complement C2 OS=Homo sapiens OX=9606 GN=C2 PE=1 SV=2	-0.2207	-0.507855	-0.825206	-0.904855	-0.613418	-0.578475	-0.636074	-0.649729	-0.491262	-0.598336	-0.414899	-0.55371	-0.435598	-0.583724	-0.921857	-0.52011	-0.682714	-0.827485	-1.19724	-0.742426	-0.845656	-0.810401	-0.933852	-0.888224	-0.976359	-0.70236	-0.896378	-1.0567	-1.26096	-1.34184	-1.11596	-0.982155	-0.716697	-0.826806	-1.66719	-1.36272	-0.924259	-0.807225	-1.05867	-1.13557
+	2.79121	0.371787	Color2 [A=255, R=169, G=169, B=169]	1	4		P51160	Cone cGMP-specific 3',5'-cyclic phosphodiesterase subunit alpha' OS=Homo sapiens OX=9606 GN=PDE6C PE=1 SV=2	-0.325038	-0.788266	-1.20996	-1.36947	-1.26631	-0.991223	-1.22187	-1.55089	-1.17742	-1.17499	-1.36342	-1.63232	-1.16478	-1.12998	-1.5208	-1.19388	-0.449026	-0.831113	-1.42718	-0.947023	-1.93763	-2.04259	-1.0253	-1.228	-1.61615	-1.6452	-0.99144	-1.30192	-1.95569	-2.06274	-1.31747	-1.70884	-1.28359	-1.18018	-1.55517	-1.99081	-1.07962	-1.30626	-1.60273	-1.33937
+	2.42582	0.43207	Color2 [A=255, R=169, G=169, B=169]	1	4		P07360	Complement component C8 gamma chain OS=Homo sapiens OX=9606 GN=C8G PE=1 SV=3	-0.622012	-0.867091	-0.806298	-0.956994	-1.75088	-1.54399	-1.49937	-1.22867	-1.15374	-1.19318	-1.07602	-0.807645	-1.30059	-1.29814	-1.53548	-1.09977	-0.771996	-1.17973	-1.13048	-1.05987	-2.07652	-2.44428	-1.08645	-1.0624	-1.24703	-0.70307	-1.66932	-1.74693	-1.80177	-1.8549	-1.5549	-2.11454	-0.655931	-0.737638	-1.77949	-2.17464	-2.27037	-2.1059	-1.1712	-1.26605
+	11.5349	2.64067	Color2 [A=255, R=169, G=169, B=169]	1	4		Q66K66	Transmembrane protein 198 OS=Homo sapiens OX=9606 GN=TMEM198 PE=1 SV=1	-0.710843	0.00147152	-0.61	-0.802686	-0.378531	-0.31725	-0.257	-0.67786	-0.316393	-0.535687	-0.68497	-0.520564	-0.127459	-0.351539	-0.11321	-0.701953	0.238142	-2.88122	-0.349545	-0.627028	-4.08665	-3.51076	-3.23906	-3.28388	-3.21403	-3.47145	-3.47615	-3.72451	-3.65077	-3.80967	-3.69602	-2.37751	-0.0848589	-3.32637	-2.29596	-3.49839	-3.48633	-3.69882	-4.37451	-1.23177
+	2.39104	-0.608459	Color2 [A=255, R=169, G=169, B=169]	1	4		O43866	CD5 antigen-like OS=Homo sapiens OX=9606 GN=CD5L PE=1 SV=1	-0.71292	-1.27993	0.943501	0.856465	1.20071	1.12237	1.53914	1.50858	0.530396	0.523421	0.0223093	-0.022212	0.0180912	-0.171638	0.523839	0.455184	1.20847	0.915845	0.0562706	0.0629253	1.59575	1.66004	1.65979	1.53152	1.44426	1.39744	0.256863	0.00305462	1.30445	1.27206	1.40162	0.741041	0.248246	0.369969	1.3744	0.96509	1.0079	0.913445	1.07422	1.24886
+	2.36918	-0.531681	Color2 [A=255, R=169, G=169, B=169]	1	4		P04433	Immunoglobulin kappa variable 3-11 OS=Homo sapiens OX=9606 GN=IGKV3-11 PE=1 SV=1	-1.83498	-2.13251	-0.310819	-0.542245	0.322473	0.383704	0.0541553	0.015049	0.456654	0.516023	-0.54272	-0.427129	-0.873098	-1.01637	-0.145442	-0.293014	-0.306087	-0.637176	-0.963615	-0.825556	0.368783	0.43077	0.214463	-0.0174465	0.0826979	0.0043869	0.598215	0.192872	0.296562	0.201357	-0.028265	-0.778507	-0.00766659	-0.313033	0.608502	0.226082	0.0364208	0.140769	-0.528121	-0.197917
+	4.43316	-0.670337	Color2 [A=255, R=169, G=169, B=169]	1	4		P01700	Immunoglobulin lambda variable 1-47 OS=Homo sapiens OX=9606 GN=IGLV1-47 PE=1 SV=2	-2.10964	-2.68808	-0.570479	-0.861621	-1.31239	-1.19605	-1.3617	-1.48889	-1.06818	-1.02602	-1.31579	-1.58724	-2.1938	-1.95429	-0.593011	-0.891208	-0.943914	-1.3102	-1.78749	-2.05497	-0.436	-0.214597	-0.776536	-0.868576	-0.986815	-0.871161	-0.437977	-0.599423	-0.469244	-0.551344	-0.713079	-1.38834	-1.05992	-1.26254	-0.699994	-0.958851	-0.564405	-0.500873	-0.970006	-0.578555
+	2.38825	0.428418	Color2 [A=255, R=169, G=169, B=169]	1	4		Q9NP78	ATP-binding cassette sub-family B member 9 OS=Homo sapiens OX=9606 GN=ABCB9 PE=1 SV=1	-2.42977	-3.64766	-4.10201	-4.10196	-3.05731	-4.31394	-4.05608	-3.74162	-3.75685	-4.03273	-3.4736	-3.20092	-3.67538	-4.68221	-3.99173	-3.46494	-4.29657	-4.09014	-3.82268	-3.80628	-4.2106	-5.06773	-3.91705	-4.11442	-4.21691	-3.9786	-3.89264	-4.26403	-3.88388	-4.09498	-4.31203	-4.21242	-3.73315	-4.29175	-3.78247	-4.22508	-4.54692	-4.24797	-5.23176	-4.08835
+	3.97533	-0.476218	Color2 [A=255, R=169, G=169, B=169]	1	4		P23083	Immunoglobulin heavy variable 1-2 OS=Homo sapiens OX=9606 GN=IGHV1-2 PE=1 SV=2	-2.66757	-3.12405	-1.98375	-2.49523	-2.1117	-1.92135	-1.96234	-1.91034	-2.36308	-2.41552	-2.53935	-2.2175	-2.0517	-2.07926	-1.93412	-2.34882	-2.15935	-2.5851	-2.5895	-2.59207	-1.38854	-1.55794	-1.751	-1.85082	-2.11874	-2.40668	-1.33586	-1.5901	-1.52519	-1.29601	-2.00194	-2.45332	-1.9682	-2.42648	-1.50024	-1.75777	-1.61957	-1.98003	-2.32024	-1.67867
+	3.23037	-0.628623	Color2 [A=255, R=169, G=169, B=169]	1	4		A0A0C4DH72	Immunoglobulin kappa variable 1-6 OS=Homo sapiens OX=9606 GN=IGKV1-6 PE=3 SV=1	-4.03369	-4.11866	-3.87981	-3.81442	-3.48832	-3.50185	-3.21241	-3.26052	-2.84659	-3.05484	-4.08667	-4.04036	-4.13062	-4.62187	-2.48061	-2.83488	-2.81456	-3.3993	-4.01913	-4.20471	-3.42037	-3.25263	-3.10877	-3.5136	-3.55856	-3.43128	-2.60423	-3.08913	-2.72608	-2.61143	-3.16508	-3.7978	-2.62099	-2.78907	-2.06071	-2.194	-2.59356	-3.25017	-2.62122	-2.86269
+	1.61234	-0.705302	Color2 [A=255, R=169, G=169, B=169]	1	4		P01701	Immunoglobulin lambda variable 1-51 OS=Homo sapiens OX=9606 GN=IGLV1-51 PE=1 SV=2	-4.59428	-4.9337	-3.76496	-4.21472	-4.14821	-4.0836	-2.68281	-2.58397	-2.34582	-2.51811	-3.49875	-3.29595	-3.65072	-3.91576	-2.54496	-2.80352	-2.46797	-2.77972	-4.34046	-4.43741	-2.90546	-2.82357	-2.66047	-2.65434	-3.22204	-2.98783	-2.09933	-2.08922	-1.43169	-0.905548	-2.45464	-2.63562	-2.98964	-3.22836	-2.06737	-2.38348	-2.51703	-2.68111	-5.44331	-5.31931
	0.717127	-0.0803566	Color2 [A=255, R=169, G=169, B=169]	1	4		P02768	Serum albumin OS=Homo sapiens OX=9606 GN=ALB PE=1 SV=2	12.018	11.8639	11.4524	11.5037	11.6326	11.7779	11.5971	11.431	11.6493	11.7052	11.4804	11.6213	12.1847	12.007	11.7932	11.6507	12.1218	11.837	11.6564	11.7704	11.7516	11.8336	11.9195	11.764	11.9223	11.931	11.8301	11.6047	11.7927	11.7864	11.8383	11.3414	12.0396	11.9894	12.0591	11.7268	11.9559	11.7725	11.7051	11.7971
	0.729238	-0.140128	Color2 [A=255, R=169, G=169, B=169]	1	4		P02647	Apolipoprotein A-I OS=Homo sapiens OX=9606 GN=APOA1 PE=1 SV=1	8.58089	8.29599	7.56491	7.46232	7.71821	7.35927	7.5526	7.41604	7.45585	7.55358	7.85663	7.84784	7.98486	7.75102	7.48543	7.42011	7.53679	7.42273	7.50095	7.63698	7.54178	7.53623	7.95431	7.82266	7.24699	7.39958	7.69993	7.51847	7.83341	7.81569	8.32213	7.57919	8.30788	8.39057	8.04571	7.59435	8.25254	8.19417	7.69	7.45997
	0.392617	0.0836022	Color2 [A=255, R=169, G=169, B=169]	1	4		P02787	Serotransferrin OS=Homo sapiens OX=9606 GN=TF PE=1 SV=3	8.22791	8.11648	8.23801	8.29204	7.60381	7.64575	7.63516	7.60728	7.83269	7.96858	8.24649	8.29025	8.79207	8.51357	7.77082	7.85624	7.59931	7.32576	7.75072	7.81829	7.88825	7.78961	7.82833	7.682	7.86386	8.04023	7.70793	7.58508	7.54313	7.58828	8.08344	7.59749	8.15814	8.55065	8.05184	7.74294	8.07737	8.00633	7.76402	7.91029
	0.498727	0.127847	Color2 [A=255, R=169, G=169, B=169]	1	4		P01023	Alpha-2-macroglobulin OS=Homo sapiens OX=9606 GN=A2M PE=1 SV=3	7.81242	7.61215	7.47131	7.35397	8.37606	8.23039	6.60111	6.54099	7.30466	7.43739	7.4429	7.47698	7.38865	7.14931	7.24147	7.04093	8.16663	7.87519	7.08924	7.19014	7.25337	7.40775	7.63773	7.59971	7.15127	7.32172	7.2728	7.16462	7.38993	7.4515	7.52263	6.95854	7.16545	7.28798	7.9886	7.7338	7.23808	7.02798	6.79186	6.87963
	0.603224	-0.0943779	Color2 [A=255, R=169, G=169, B=169]	1	4		P01009	Alpha-1-antitrypsin OS=Homo sapiens OX=9606 GN=SERPINA1 PE=1 SV=3	6.98732	6.89813	6.64355	6.64453	6.9312	6.69475	6.38165	6.23509	6.59019	6.7791	6.6104	6.68821	6.61211	6.25789	6.68288	6.66649	7.33349	7.10874	6.59736	6.71515	6.62603	6.51855	7.04712	7.0912	6.84285	7.08173	6.77146	6.59369	6.48915	6.84588	7.19565	6.73118	6.95726	7.09783	6.66507	6.23749	6.95067	6.87749	6.59307	6.73239
	1.03562	0.172534	Color2 [A=255, R=169, G=169, B=169]	1	4		P02679	Fibrinogen gamma chain OS=Homo sapiens OX=9606 GN=FGG PE=1 SV=3	6.87759	6.84496	6.44375	6.48227	6.95609	6.24907	6.36799	6.13381	6.53407	6.56259	6.48311	6.49012	6.60511	5.70531	6.74079	6.83473	6.52301	6.26672	6.20771	6.33069	6.38969	5.47536	6.51664	6.32396	6.39773	6.64586	6.57569	6.50222	6.5784	6.16177	6.21995	6.02091	6.31344	6.69431	6.60937	5.87147	6.33844	6.30668	5.64341	6.60353
	1.39665	0.269583	Color2 [A=255, R=169, G=169, B=169]	1	4		P02675	Fibrinogen beta chain OS=Homo sapiens OX=9606 GN=FGB PE=1 SV=2	6.72686	6.61811	6.23988	6.2808	6.82594	6.07792	6.07924	5.87143	6.38453	6.44057	6.11869	6.19432	6.30235	5.05196	6.55544	6.58857	6.1677	5.9624	5.84371	6.1436	6.07395	4.80548	6.26519	5.88092	6.08677	6.32373	6.22206	6.19462	6.51001	5.95648	5.85216	5.61201	5.90578	6.26452	6.34685	5.40397	5.79562	5.94533	5.33391	6.30302
	1.66245	0.238303	Color2 [A=255, R=169, G=169, B=169]	1	4		P02671	Fibrinogen alpha chain OS=Homo sapiens OX=9606 GN=FGA PE=1 SV=2	6.35138	6.32305	6.01242	6.07769	6.63117	5.74597	6.01686	5.70321	6.15826	6.24251	5.86335	6.01488	6.00769	5.26118	6.49271	6.48438	5.94247	5.8049	5.70662	5.99092	5.93457	5.11005	6.00189	5.69098	5.7612	6.10353	6.07414	6.0899	6.25707	5.80023	5.57593	5.65131	5.50032	6.10975	6.16806	5.44217	5.56691	5.80935	5.42358	5.99463
	1.23906	0.417585	Color2 [A=255, R=169, G=169, B=169]	1	4		P01876	Immunoglobulin heavy constant alpha 1 OS=Homo sapiens OX=9606 GN=IGHA1 PE=1 SV=2	6.32273	6.06204	6.00389	5.92077	5.92225	6.14843	6.07041	6.14096	6.97059	6.98889	6.42329	6.53292	5.95895	6.01092	6.45863	6.36613	6.70137	6.46834	5.37373	5.3555	6.58023	6.55717	5.49231	5.47964	5.63846	5.66828	7.04626	6.90977	7.03946	6.89102	5.67383	5.06617	4.07989	4.08554	5.68384	5.35862	5.68246	5.58959	5.47425	5.85226
	0.0921193	-0.0212921	Color2 [A=255, R=169, G=169, B=169]	1	4		P02652	Apolipoprotein A-II OS=Homo sapiens OX=9606 GN=APOA2 PE=1 SV=1	6.13591	5.91443	5.13774	5.30549	5.06269	5.15355	5.03376	5.15026	5.32729	5.3976	5.21121	5.51264	6.07793	5.54877	5.45699	5.40075	5.74308	5.4734	5.5155	5.66954	5.31171	5.4659	5.40484	5.38063	5.11923	5.31617	5.60614	5.39567	5.40074	5.35764	5.89908	5.48299	5.81953	5.89817	5.52742	5.30308	5.83198	5.54383	5.4283	5.16134
	0.64004	0.0918347	Color2 [A=255, R=169, G=169, B=169]	1	4		P02790	Hemopexin OS=Homo sapiens OX=9606 GN=HPX PE=1 SV=2	6.03972	5.73605	5.2613	5.24508	5.30782	5.24243	5.56089	5.38783	5.42934	5.48276	5.82439	5.74241	5.95673	5.79251	5.3905	5.52776	5.72712	5.47583	5.53336	5.57561	5.49872	5.4272	5.39435	5.30024	5.3652	5.47484	5.42111	5.20158	4.98056	5.03077	5.64622	5.22668	5.66363	5.80781	5.82008	5.48786	5.71896	5.54041	5.64094	5.75562
	0.22448	0.0602215	Color2 [A=255, R=169, G=169, B=169]	1	4		P04114	Apolipoprotein B-100 OS=Homo sapiens OX=9606 GN=APOB PE=1 SV=2	5.44886	5.21575	4.80996	4.71194	4.3777	4.29184	5.21948	5.04667	4.33113	4.48328	5.06638	4.99004	5.23386	4.9774	4.54205	4.14978	4.72032	4.63348	4.78787	5.03847	4.43028	4.59573	4.44677	4.17975	4.6046	5.00578	5.5586	5.26854	4.6567	4.69944	5.10532	4.83672	4.51524	4.7105	5.12041	4.95813	4.77014	4.78965	4.36116	4.25838
	0.344273	0.105632	Color2 [A=255, R=169, G=169, B=169]	1	4		P0C0L5	Complement C4-B OS=Homo sapiens OX=9606 GN=C4B PE=1 SV=2	5.33261	5.2516	5.06728	4.87593	4.16124	4.12733	4.60654	4.76347	5.83001	5.27865	4.95265	4.86573	5.22891	6.29379	5.03236	5.26896	4.74316	4.62462	5.14544	5.78966	4.70233	5.74752	5.06753	5.46001	4.90993	5.15498	5.34223	5.16156	4.67895	4.64615	4.39013	4.4811	4.72115	5.15542	5.0614	4.83525	4.79988	4.71142	5.06324	5.03713
	0.272547	-0.0791162	Color2 [A=255, R=169, G=169, B=169]	1	4		B9A064	Immunoglobulin lambda-like polypeptide 5 OS=Homo sapiens OX=9606 GN=IGLL5 PE=2 SV=2	5.12756	4.84249	4.79665	4.58552	4.61435	4.89724	4.63263	4.77653	4.92923	4.96352	4.13461	4.60308	4.33125	4.45971	5.16201	4.95922	5.26324	4.92379	4.23443	4.2901	5.28383	5.08373	4.86973	4.69042	4.77006	4.98751	5.1878	5.1561	5.69256	5.48399	4.73747	4.36801	3.90784	3.88818	4.63705	4.33205	4.71824	4.57237	4.71556	5.02696
	0.0130854	0.00215902	Color2 [A=255, R=169, G=169, B=169]	1	4		P00450	Ceruloplasmin OS=Homo sapiens OX=9606 GN=CP PE=1 SV=1	4.94481	4.64947	4.82516	4.74656	4.61314	4.4089	4.77785	4.70504	4.83043	4.81298	4.98169	4.86892	4.73275	4.66391	4.58275	4.60543	4.74246	4.47266	4.35129	4.2942	4.73338	4.52285	4.83103	4.91199	4.49363	4.51842	4.57869	4.38921	4.61137	4.77215	4.99119	4.70625	4.67404	4.83981	4.66347	4.57956	4.97054	4.81152	4.43831	4.52982
	0.305171	-0.0944365	Color2 [A=255, R=169, G=169, B=169]	1	4		P01834	Immunoglobulin kappa constant OS=Homo sapiens OX=9606 GN=IGKC PE=1 SV=2	4.93733	4.59652	5.81775	5.84405	5.87135	6.03001	5.92898	5.96292	6.34888	6.43635	5.71425	5.62619	5.78358	5.65887	6.10526	5.94189	6.28458	6.02521	5.47204	5.51349	6.15052	6.02009	5.818	5.807	5.74876	5.80739	6.24143	6.17099	6.5391	6.57435	6.09039	5.34953	5.53334	5.22889	6.44917	6.03783	5.9973	5.86476	5.05534	5.30402
	0.718775	0.266505	Color2 [A=255, R=169, G=169, B=169]	1	4		P68871	Hemoglobin subunit beta OS=Homo sapiens OX=9606 GN=HBB PE=1 SV=2	4.77651	3.45643	3.4249	3.90141	2.9171	4.36866	5.04305	3.48178	3.59441	3.83535	3.43401	3.80668	3.76545	5.38429	3.34788	3.11935	3.11623	3.82926	5.38045	3.2713	3.12269	3.73736	3.25181	3.80614	3.41462	3.65639	3.6625	4.2385	3.31174	3.23642	3.48491	3.52506	2.69877	3.37501	4.07576	3.50184	3.36916	3.63492	3.64336	5.17744
	0.630681	-0.089731	Color2 [A=255, R=169, G=169, B=169]	1	4		P02774	Vitamin D-binding protein OS=Homo sapiens OX=9606 GN=GC PE=1 SV=2	4.66235	4.54087	4.28063	4.20221	4.01168	4.03262	3.83405	3.83212	3.83685	4.06791	4.40484	4.45981	4.66199	4.34982	4.18746	4.35081	4.50479	4.2825	4.24323	4.41517	4.18533	4.09698	4.41895	4.40462	4.48425	4.65775	4.34208	4.19954	4.07352	4.09306	4.66246	4.29158	4.62581	4.69804	4.52964	4.32336	4.38696	4.2362	4.11355	4.13263
	0.761955	0.18999	Color2 [A=255, R=169, G=169, B=169]	1	4		P06727	Apolipoprotein A-IV OS=Homo sapiens OX=9606 GN=APOA4 PE=1 SV=3	4.48834	4.74241	3.64779	3.54518	5.16934	4.69358	4.77807	4.26002	4.38755	4.20158	4.51618	4.64873	4.8469	5.01752	4.05966	4.51759	4.21029	3.5789	5.01942	4.50755	4.41833	4.15786	4.32352	3.98381	4.63103	5.48784	4.19686	4.55142	4.19852	3.94199	3.95526	3.58671	4.48085	4.26425	4.49021	3.9461	3.85563	4.41173	4.09687	4.05802
	0.971482	-0.200619	Color2 [A=255, R=169, G=169, B=169]	1	4		P01859	Immunoglobulin heavy constant gamma 2 OS=Homo sapiens OX=9606 GN=IGHG2 PE=1 SV=2	4.4623	4.01835	5.21765	4.98165	5.2962	5.40757	4.87921	4.86731	5.15877	5.19901	4.67733	4.67945	4.63257	4.64283	5.0976	5.28257	4.98743	4.51984	4.96241	4.93235	5.74906	5.68338	4.87495	4.73635	4.8619	4.97372	5.00502	4.78176	5.71153	5.6405	5.39045	4.55255	4.49339	4.32298	5.52093	5.05408	5.26999	5.12013	4.98685	5.18526
	0.746497	-0.144516	Color2 [A=255, R=169, G=169, B=169]	1	4		P01011	Alpha-1-antichymotrypsin OS=Homo sapiens OX=9606 GN=SERPINA3 PE=1 SV=2	4.37936	4.14254	3.82298	3.75555	3.76568	3.57293	3.17938	3.14625	3.4011	3.43465	3.84774	3.81557	3.95344	3.68301	3.90867	3.97162	4.31213	4.12823	3.757	3.73011	3.85371	3.34285	3.86249	3.97431	4.01738	4.10717	3.71413	3.57257	3.2211	3.54468	4.07614	3.76279	4.23404	4.18124	4.07354	3.86916	4.26901	3.97432	4.39234	4.55528
	1.39663	0.146878	Color2 [A=255, R=169, G=169, B=169]	1	4		P00747	Plasminogen OS=Homo sapiens OX=9606 GN=PLG PE=1 SV=2	4.09393	3.869	3.74565	3.73426	3.88434	3.66073	3.59418	3.53707	3.75869	3.6647	3.79031	3.68187	3.9532	4.03062	3.44831	3.53675	3.6541	3.64968	3.56678	3.80968	3.51637	3.18572	3.6547	3.68238	3.58795	3.87192	3.92704	3.86915	3.78193	3.63244	4.00293	3.61049	2.96533	3.34019	3.73892	3.32402	3.54855	3.63085	3.39473	3.46067
	0.43154	-0.0969758	Color2 [A=255, R=169, G=169, B=169]	1	4		P02763	Alpha-1-acid glycoprotein 1 OS=Homo sapiens OX=9606 GN=ORM1 PE=1 SV=1	4.09204	4.13375	3.79875	3.85802	3.49269	3.31217	4.35593	4.25986	4.39222	3.98799	4.10676	4.15788	4.34805	4.3621	3.86314	4.00205	4.2937	4.35353	4.11223	4.17151	4.20884	4.07686	3.8956	4.15309	3.99299	4.26929	3.99297	3.70945	3.85625	4.24324	3.70918	3.70756	4.21656	4.28849	4.18904	4.18186	4.30031	4.16955	5.11732	5.11544
	0.051748	-0.0127737	Color2 [A=255, R=169, G=169, B=169]	1	4		P04217	Alpha-1B-glycoprotein OS=Homo sapiens OX=9606 GN=A1BG PE=1 SV=4	3.93866	3.73522	2.50618	2.53549	3.30626	3.23638	3.38683	3.14952	3.27386	3.35522	3.59522	3.56416	3.56105	3.31845	3.24609	3.37107	3.5204	3.31621	3.10727	3.20087	3.42417	3.26225	3.51594	3.42617	3.01694	3.12778	3.20317	3.04408	3.00558	3.09704	3.57944	3.27417	3.58999	3.71735	3.28095	3.08752	3.56647	3.47649	3.45336	3.33103
	2.85468	0.291243	Color2 [A=255, R=169, G=169, B=169]	1	4		P19823	Inter-alpha-trypsin inhibitor heavy chain H2 OS=Homo sapiens OX=9606 GN=ITIH2 PE=1 SV=2	3.92177	3.95066	3.60098	3.45448	3.22463	3.22227	3.2247	3.11645	2.92776	3.04112	3.35414	3.49561	3.82184	3.5881	3.53072	3.62698	3.34805	2.98793	3.39871	3.59406	3.10099	3.20498	3.42478	3.49789	3.36222	3.40199	3.37917	3.05528	3.13229	3.13783	3.2032	2.78045	3.27529	3.28785	3.14884	2.83175	3.02621	2.79061	2.68538	2.8791
	1.44242	0.128785	Color2 [A=255, R=169, G=169, B=169]	1	4		P01042	Kininogen-1 OS=Homo sapiens OX=9606 GN=KNG1 PE=1 SV=2	3.91627	3.65373	3.29472	3.13216	3.37285	3.31004	3.43735	3.42548	3.46915	3.60069	3.39245	3.52528	3.65809	3.44433	3.2345	3.28565	3.39782	3.27437	3.38959	3.49925	3.1095	3.00742	3.4595	3.43424	3.30901	3.4758	3.42736	3.21299	3.12771	3.16858	3.58275	3.11597	3.4459	3.62565	3.28626	2.90735	3.36247	3.15427	3.4446	3.48073
	0.86348	0.19814	Color2 [A=255, R=169, G=169, B=169]	1	4		P02765	Alpha-2-HS-glycoprotein OS=Homo sapiens OX=9606 GN=AHSG PE=1 SV=2	3.87345	3.86256	3.87204	3.89123	4.25079	4.22682	3.5486	3.49759	3.79902	3.95182	3.88124	3.88126	4.29659	3.85602	3.71272	3.84248	4.5094	3.96093	3.93332	4.08971	3.8709	4.08408	3.8779	3.66546	4.08142	4.16346	4.11964	4.05879	3.83389	3.78807	4.23462	3.70619	3.84987	3.92241	3.85522	3.72371	2.32225	2.24173	3.50064	3.87457
	2.06694	0.374409	Color2 [A=255, R=169, G=169, B=169]	1	4		P02749	Beta-2-glycoprotein 1 OS=Homo sapiens OX=9606 GN=APOH PE=1 SV=3	3.6151	3.15469	2.71209	2.81874	3.24379	3.38235	3.26199	3.04353	2.83246	3.00224	3.63795	3.42201	3.70975	3.64514	2.90177	3.185	3.16965	2.79218	3.36583	3.51175	3.06471	3.10765	3.01837	2.92119	3.18429	3.29148	1.48198	1.48876	2.68014	2.6335	3.00363	2.52345	3.18209	3.20379	3.18606	2.72764	2.84843	2.88028	3.27945	3.21293
	0.731994	0.105013	Color2 [A=255, R=169, G=169, B=169]	1	4		P01008	Antithrombin-III OS=Homo sapiens OX=9606 GN=SERPINC1 PE=1 SV=1	3.4493	3.07728	2.89447	2.90204	3.05628	3.05407	2.70759	2.63861	2.82678	2.96658	2.75045	2.9758	3.27331	2.87937	2.85589	2.95892	3.09266	2.99997	3.08102	3.06618	2.86594	2.44789	3.02208	2.83914	3.12636	3.17629	3.16661	3.00249	2.58222	2.68569	3.01556	2.43165	3.08799	3.27869	3.10033	2.7285	3.09684	2.99594	2.33988	2.41623
	0.93871	0.148892	Color2 [A=255, R=169, G=169, B=169]	1	4		P10909	Clusterin OS=Homo sapiens OX=9606 GN=CLU PE=1 SV=1	3.3879	3.09962	2.89008	2.90051	3.20177	2.91034	3.02198	2.81362	2.90693	2.91127	3.01136	3.01197	3.11379	3.03564	3.12121	3.02716	3.03241	2.92364	3.02603	3.0399	2.96193	2.92017	1.98003	1.83271	2.83539	3.14799	3.27792	3.07539	2.93131	2.91346	3.0196	2.78655	3.20298	3.33037	3.20445	2.96445	2.98665	2.91819	2.75095	2.3688
	2.93669	0.234001	Color2 [A=255, R=169, G=169, B=169]	1	4		P19827	Inter-alpha-trypsin inhibitor heavy chain H1 OS=Homo sapiens OX=9606 GN=ITIH1 PE=1 SV=3	3.34824	3.11691	3.10603	2.97262	2.90117	2.93974	2.87649	2.8102	2.64653	2.6946	3.16539	3.13542	3.31875	3.00089	3.15519	3.0651	3.03449	2.67356	2.93221	3.03552	2.92728	2.93207	2.91424	2.93509	2.9876	2.84645	2.92781	2.74798	2.78451	2.71083	2.96012	2.30009	2.92318	2.87517	2.54756	2.17311	2.87734	2.54096	2.62431	2.71335
	0.879658	0.312954	Color2 [A=255, R=169, G=169, B=169]	1	4		P69905	Hemoglobin subunit alpha OS=Homo sapiens OX=9606 GN=HBA1 PE=1 SV=2	3.32368	2.27652	2.04359	2.69932	1.66946	3.02378	3.87504	2.28388	2.33673	2.6868	2.2841	2.50982	2.55065	4.27815	1.94918	2.08068	1.98933	2.68305	4.27376	2.1293	1.84762	2.40251	1.76413	2.5485	2.11934	2.47175	2.40989	2.96079	2.28826	1.9836	2.08685	2.25359	1.54488	1.94549	2.89958	2.30058	2.05514	2.41647	2.48786	3.9009
	1.05126	0.120275	Color2 [A=255, R=169, G=169, B=169]	1	4		P00734	Prothrombin OS=Homo sapiens OX=9606 GN=F2 PE=1 SV=2	3.31975	3.04624	3.13712	3.15296	3.12701	2.93358	2.99228	2.89466	2.86695	3.03883	3.32579	3.23198	3.45027	3.19455	3.1641	3.3024	2.87472	2.77511	2.86383	3.16018	2.84901	2.71171	2.95014	2.98572	3.09734	3.21833	3.08528	2.93585	2.53825	2.5395	3.56625	3.15303	3.03209	3.13705	3.15744	2.8784	3.15105	2.96643	2.69684	2.79709
	0.03929	-0.0398664	Color2 [A=255, R=169, G=169, B=169]	1	4		P01861	Immunoglobulin heavy constant gamma 4 OS=Homo sapiens OX=9606 GN=IGHG4 PE=1 SV=1	3.30003	2.76203	-0.314689	-0.0101061	2.31944	2.45049	2.14551	2.24745	1.38639	1.34577	-0.0259371	0.310643	-0.178736	-1.28765	2.00812	1.46327	2.21581	1.7583	2.0698	1.93285	1.22212	0.771749	1.56868	1.11537	2.1313	2.22014	2.03982	1.9	2.95922	3.0913	1.75728	0.948225	1.26958	1.43248	2.47467	2.20073	-1.54361	-0.166612	0.629478	0.67419
	1.03803	0.553845	Color2 [A=255, R=169, G=169, B=169]	1	4		P02751	Fibronectin OS=Homo sapiens OX=9606 GN=FN1 PE=1 SV=4	3.26633	4.12706	3.66368	3.93651	2.60026	3.07699	2.74534	3.17025	3.44505	3.4412	3.6914	3.6262	3.65795	4.51603	3.60937	3.7353	2.2649	2.0628	3.3314	4.22145	2.5346	2.3887	2.8045	3.69442	1.79394	3.88191	3.25254	4.98732	4.66904	3.14694	1.89006	4.4372	1.59451	2.17999	2.93545	1.38848	-0.369066	2.39433	4.12476	3.3829
	0.0778529	-0.0380551	Color2 [A=255, R=169, G=169, B=169]	1	4		A0M8Q6	Immunoglobulin lambda constant 7 OS=Homo sapiens OX=9606 GN=IGLC7 PE=1 SV=3	3.25107	2.39602	1.47388	1.33688	2.70949	2.20677	2.58404	1.95622	3.04714	2.43186	2.66231	1.94786	1.37294	1.31918	2.272	2.33552	2.37698	2.86796	0.982254	1.00553	2.53418	2.42307	1.93325	1.84466	2.05485	2.18398	2.6018	2.36145	2.90945	2.717	2.61117	1.65207	1.10846	1.36948	2.10537	1.93849	2.32835	2.26559	1.86788	2.48645
	0.336444	-0.0486267	Color2 [A=255, R=169, G=169, B=169]	1	4		Q14624	Inter-alpha-trypsin inhibitor heavy chain H4 OS=Homo sapiens OX=9606 GN=ITIH4 PE=1 SV=4	3.11188	3.23103	2.95428	2.93423	2.86892	2.90305	2.86142	2.60817	3.05086	3.09036	2.49293	2.75075	2.8677	2.81862	3.02786	2.95631	3.28049	2.72366	2.71662	2.74973	3.13966	3.16474	3.12355	3.0985	2.87586	2.9166	2.71794	2.57315	2.46906	2.65756	3.10707	2.91742	2.81432	2.87468	3.18907	2.96658	3.22962	3.05422	3.04536	3.03645
	0.591544	-0.234051	Color2 [A=255, R=169, G=169, B=169]	1	4		P02656	Apolipoprotein C-III OS=Homo sapiens OX=9606 GN=APOC3 PE=1 SV=1	2.87407	2.16217	2.09426	2.07526	2.19142	2.13644	3.00895	2.75885	1.85052	1.89865	3.5278	3.45337	3.66356	3.87295	3.1305	3.27639	1.39775	1.66718	1.72892	2.39981	2.17217	2.55261	2.34295	2.14016	2.12799	3.28349	2.7274	2.61701	2.67236	2.4722	3.42227	2.33154	3.0771	3.3812	2.54551	2.21202	3.37711	3.46298	3.6012	3.33055
	0.320853	0.0494449	Color2 [A=255, R=169, G=169, B=169]	1	4		P04004	Vitronectin OS=Homo sapiens OX=9606 GN=VTN PE=1 SV=1	2.72855	2.42434	2.60813	2.45231	2.70382	2.5336	2.44255	2.3447	2.38678	2.43139	2.89668	2.82154	2.92112	2.82786	2.44699	2.57342	2.68651	2.40023	2.54919	2.72318	2.88848	2.61391	2.42659	2.53336	2.59299	2.70176	2.54353	2.56415	2.62241	2.48811	2.95273	2.48742	2.79643	2.76854	2.70413	2.36912	2.45711	2.45219	1.97294	1.97809
	0.337404	-0.126314	Color2 [A=255, R=169, G=169, B=169]	1	4		P02649	Apolipoprotein E OS=Homo sapiens OX=9606 GN=APOE PE=1 SV=1	2.66078	2.2321	1.87428	1.93952	1.57263	1.52585	1.82667	1.9453	1.31465	1.71934	2.07518	2.24863	2.33472	1.96477	2.51742	2.93057	1.57165	1.99892	1.00846	1.35103	1.46377	1.76031	1.49807	1.44322	1.46179	1.96342	1.91487	1.81755	2.18271	2.04782	2.57153	1.94734	2.49877	2.94143	2.01621	1.48288	3.31853	3.32243	1.68088	1.8052
	0.640186	-0.11513	Color2 [A=255, R=169, G=169, B=169]	1	4		P06396	Gelsolin OS=Homo sapiens OX=9606 GN=GSN PE=1 SV=1	2.51952	2.48273	1.45965	1.68447	2.11428	2.19565	1.68669	1.6275	1.76762	1.78168	2.15658	2.14559	2.67625	2.30107	1.66259	1.89358	2.72044	2.15301	1.99587	1.93993	1.75351	1.89011	2.26852	1.94355	2.38451	2.53554	2.05802	2.12159	2.28261	2.44315	2.35395	2.04667	2.30377	2.34947	2.38263	1.96601	2.11455	1.92494	2.02406	2.12014
	1.22874	0.205832	Color2 [A=255, R=169, G=169, B=169]	1	4		P19652	Alpha-1-acid glycoprotein 2 OS=Homo sapiens OX=9606 GN=ORM2 PE=1 SV=2	2.51898	2.68891	2.27568	2.44071	3.17784	2.78395	2.55457	2.72187	2.83868	2.59493	2.57945	2.77389	2.80069	2.77079	2.71027	2.88164	2.72241	2.61391	2.84414	2.91705	2.21099	2.29657	2.19859	2.4726	2.48651	2.53425	2.67464	2.54721	2.34823	2.48397	2.20936	2.2259	2.4678	2.53764	2.64344	2.6837	1.87361	2.00338	3.56112	3.63422
	0.0458078	0.0266117	Color2 [A=255, R=169, G=169, B=169]	1	4		P01860	Immunoglobulin heavy constant gamma 3 OS=Homo sapiens OX=9606 GN=IGHG3 PE=1 SV=2	2.48584	2.32693	3.6194	3.49994	3.43907	3.43016	3.07758	3.09484	3.26368	3.59874	3.66482	3.91774	3.49933	3.45858	4.30734	4.06229	3.42328	3.14739	2.69664	2.76439	3.80884	3.83422	3.04529	2.90265	2.98792	3.21124	3.62544	3.46508	4.2083	3.97273	3.94508	3.48973	1.72038	1.71933	3.92737	3.52053	2.34285	2.15977	4.03019	4.32881
	0.677393	-0.107594	Color2 [A=255, R=169, G=169, B=169]	1	4		P04196	Histidine-rich glycoprotein OS=Homo sapiens OX=9606 GN=HRG PE=1 SV=1	2.3517	2.13857	1.76652	1.79487	2.5094	2.11385	1.91356	1.7826	1.66605	1.6924	2.27157	2.24895	2.38991	2.17968	2.55035	2.50088	2.1846	1.75325	1.86396	1.98226	2.25562	2.11139	2.35002	2.29403	2.15567	2.27153	2.3763	2.2695	2.06408	2.17048	2.07555	1.51086	2.30835	2.57576	2.52604	2.21618	2.29588	2.22441	1.96099	1.79415
	1.92375	0.200576	Color2 [A=255, R=169, G=169, B=169]	1	4		P02760	Protein AMBP OS=Homo sapiens OX=9606 GN=AMBP PE=1 SV=1	2.27172	2.06645	2.16107	2.15934	2.45814	2.32654	2.0581	1.95963	1.96841	2.02313	2.64243	2.62864	2.52276	2.23439	2.03654	2.01259	2.29464	1.99042	2.13603	2.23765	2.11537	2.06336	2.18818	2.11026	2.09519	2.2593	2.2303	2.11597	1.89201	2.04918	1.93081	1.21103	1.96806	1.71582	2.12356	1.80488	1.80789	1.80246	2.25354	2.43989
	0.214813	-0.0582829	Color2 [A=255, R=169, G=169, B=169]	1	4		P05090	Apolipoprotein D OS=Homo sapiens OX=9606 GN=APOD PE=1 SV=1	2.19016	2.05061	1.71664	1.47342	1.95506	2.03975	0.858938	0.948801	1.5844	1.56729	1.55774	1.77462	2.3381	2.03944	1.02979	0.894113	1.82297	1.72086	1.43604	1.53757	1.26083	1.46066	2.14114	1.95251	1.65772	1.64455	1.81503	1.47179	1.7853	1.86763	1.99536	1.27434	1.82538	2.01777	1.81816	1.46434	1.53473	1.22155	1.74361	1.74957
	0.666092	-0.151215	Color2 [A=255, R=169, G=169, B=169]	1	4		P02654	Apolipoprotein C-I OS=Homo sapiens OX=9606 GN=APOC1 PE=1 SV=1	2.1435	1.79378	2.00195	1.35503	1.71139	1.43361	1.94292	1.94122	1.57108	1.33323	1.78704	1.48232	1.79681	1.64123	1.25811	1.5993	1.66306	0.624782	1.3163	1.26663	1.55392	1.61784	1.53746	0.919975	1.12438	1.4812	1.65387	1.527	1.47199	1.83648	2.47736	1.76827	1.94526	2.14488	2.23089	1.57712	2.57453	2.03719	1.76578	1.4422
	0.38681	0.10116	Color2 [A=255, R=169, G=169, B=169]	1	4		P10643	Complement component C7 OS=Homo sapiens OX=9606 GN=C7 PE=1 SV=2	2.03213	1.73553	1.2952	1.09378	2.02046	1.63523	0.84059	0.607695	1.46626	1.38251	1.20072	1.41682	1.30073	0.609097	1.08557	1.28167	1.52073	1.20764	0.727957	0.860397	1.01511	0.320477	1.39682	1.17344	1.05211	1.53425	1.20049	1.02569	1.33646	1.30762	1.15124	0.779278	1.56116	1.83398	1.58376	0.905949	0.978603	0.970647	0.700662	1.46977
	1.75412	-0.277395	Color2 [A=255, R=169, G=169, B=169]	1	4		P27169	Serum paraoxonase/arylesterase 1 OS=Homo sapiens OX=9606 GN=PON1 PE=1 SV=3	1.88448	1.67739	1.33846	1.24933	1.10273	0.97585	0.905664	0.816801	0.938751	1.04777	1.67963	1.49983	1.93338	1.56705	1.49284	1.58779	1.40529	1.00376	1.20382	1.69441	1.15932	0.92022	1.78643	1.70019	1.51672	1.77635	1.66504	1.46424	1.7534	1.69146	1.90994	1.34232	1.96241	2.07178	1.9398	1.59293	2.17558	2.02085	0.943351	1.16059
	1.74943	0.260427	Color2 [A=255, R=169, G=169, B=169]	1	4		P43652	Afamin OS=Homo sapiens OX=9606 GN=AFM PE=1 SV=1	1.70497	1.51075	1.27965	1.31144	0.939731	0.953773	1.32622	1.37598	1.06164	1.29661	2.13004	2.1281	2.3614	2.02012	1.61662	1.83988	1.4495	1.36109	1.39754	1.59567	1.18593	1.31243	1.07361	1.13504	0.965348	1.18013	1.71179	1.42726	1.02929	1.02517	1.5487	1.19179	1.66958	1.85238	1.30933	1.01006	1.37614	1.23551	1.04473	1.16796
	0.330042	-0.0712164	Color2 [A=255, R=169, G=169, B=169]	1	4		P01019	Angiotensinogen OS=Homo sapiens OX=9606 GN=AGT PE=1 SV=1	1.66577	1.47341	1.38858	1.33901	0.947524	0.726817	1.22981	1.26867	1.17678	1.21591	1.42219	1.63703	1.36412	1.19364	0.991504	0.998029	1.28808	1.5018	1.10637	1.49096	1.00704	1.30899	1.09984	1.41305	1.02486	1.50376	1.51981	1.31115	0.872553	0.756453	2.4466	1.68398	1.50749	1.48944	1.18265	0.977976	1.51673	1.34546	1.48795	1.39457
	0.458863	0.0792417	Color2 [A=255, R=169, G=169, B=169]	1	4		P02748	Complement component C9 OS=Homo sapiens OX=9606 GN=C9 PE=1 SV=2	1.60409	1.46073	1.49685	1.53692	1.99056	1.9589	1.36585	1.30845	1.72212	1.72478	1.67099	1.482	1.45024	1.57354	1.51386	1.56846	1.74103	1.50839	1.34212	1.25504	1.60516	1.38616	1.83374	1.85398	1.32269	1.53529	1.09643	0.880771	1.41972	1.62334	1.21053	0.797205	1.4874	1.57889	1.30784	1.47975	1.8222	1.70566	1.78605	1.95724
	1.72747	0.197384	Color2 [A=255, R=169, G=169, B=169]	1	4		P13671	Complement component C6 OS=Homo sapiens OX=9606 GN=C6 PE=1 SV=3	1.48363	1.20971	1.10992	1.09951	0.875865	0.844411	1.22798	1.09631	1.3096	1.558	1.38566	1.35081	0.939013	0.986859	1.02924	1.28587	0.925402	0.972951	1.03322	1.19347	1.03479	0.933772	1.53106	1.49428	0.838153	1.12701	0.890688	0.751807	0.392338	0.749525	0.795078	0.757292	1.25516	1.1393	1.04233	0.669031	1.16377	1.15736	0.55193	0.695081
	0.347044	0.133849	Color2 [A=255, R=169, G=169, B=169]	1	4		P02655	Apolipoprotein C-II OS=Homo sapiens OX=9606 GN=APOC2 PE=1 SV=1	1.42793	0.80889	0.782084	0.435569	0.326993	0.544547	1.12452	1.1451	0.0573769	0.446774	1.43591	1.40697	1.74669	1.73845	1.51247	1.37222	-0.234756	0.00483608	0.167179	0.701895	0.358211	0.734906	-0.338021	0.170183	0.924058	1.4846	0.85618	0.428458	0.729734	1.02842	1.05611	0.224455	0.290774	0.963559	0.375657	0.190899	1.26882	0.87456	1.50382	1.14929
	3.485	-0.290412	Color2 [A=255, R=169, G=169, B=169]	1	4		P01824	Immunoglobulin heavy variable 4-39 OS=Homo sapiens OX=9606 GN=IGHV4-39 PE=1 SV=2	1.40749	0.661401	1.02193	1.44489	1.47562	1.50542	1.30408	1.20056	1.39219	1.29023	1.11581	1.02064	1.50851	1.56604	1.54258	1.30055	1.67992	1.57417	0.838768	1.13873	1.73964	1.66951	1.56311	1.25652	1.54658	1.29937	1.70425	1.55259	1.68816	1.73804	1.81105	1.37297	1.82579	1.79059	1.7436	1.60554	1.7703	1.53427	1.31166	1.27425
	1.63984	0.154419	Color2 [A=255, R=169, G=169, B=169]	1	4		P05156	Complement factor I OS=Homo sapiens OX=9606 GN=CFI PE=1 SV=2	1.26415	1.02905	0.660815	0.674479	0.769645	0.69073	0.962452	0.87005	0.928165	1.0474	0.999326	0.99602	1.34914	1.15002	0.791072	0.913535	0.869339	0.84131	0.850048	0.944433	0.654555	0.663835	0.919524	0.911013	0.783488	1.03216	0.827381	0.580092	0.805771	0.78285	0.762417	0.18976	1.02622	1.06334	1.07815	0.67415	0.948338	0.8054	0.369281	0.635079
	1.20182	0.17637	Color2 [A=255, R=169, G=169, B=169]	1	4		Q96PD5	N-acetylmuramoyl-L-alanine amidase OS=Homo sapiens OX=9606 GN=PGLYRP2 PE=1 SV=1	1.10416	1.19928	0.6468	0.648934	0.486909	0.526982	0.17642	0.0541821	0.517504	0.571479	0.996665	0.98907	0.765594	0.813249	0.999084	1.01799	1.2556	0.915715	0.384697	0.491261	0.813693	0.590783	0.694097	0.745693	0.749734	0.703642	0.746792	0.630273	0.100616	0.485203	0.53985	0.105268	0.700953	0.78275	0.309386	0.214064	0.88113	0.600884	0.399589	0.239764
	0.544331	-0.15806	Color2 [A=255, R=169, G=169, B=169]	1	4		P02753	Retinol-binding protein 4 OS=Homo sapiens OX=9606 GN=RBP4 PE=1 SV=3	1.01893	0.839032	0.453256	0.510848	1.18179	1.15975	0.723106	0.762468	0.531353	0.595387	0.980433	1.11737	1.70615	1.76129	0.784797	0.778371	0.705156	0.805789	1.28802	1.50771	1.24009	1.25452	0.532117	0.64332	1.18685	1.41206	1.33484	1.21974	0.419647	0.403551	1.43803	0.71925	1.08514	1.21838	0.77282	0.611618	1.17698	1.08991	2.08044	2.53292
	0.114158	-0.0276413	Color2 [A=255, R=169, G=169, B=169]	1	4		O95445	Apolipoprotein M OS=Homo sapiens OX=9606 GN=APOM PE=1 SV=2	0.939353	0.542436	0.177899	0.0720263	0.0393343	-0.0117197	-0.125042	-0.0326824	-0.0028801	0.036891	0.188853	0.351634	0.585936	0.068141	0.0275412	0.096406	-0.113344	-0.00119877	-0.0049572	0.304832	0.221084	0.0845251	0.236947	0.115166	-0.160787	-0.143942	-0.18943	-0.194488	0.0271072	0.145382	0.68161	0.17086	0.688355	0.990064	0.0620909	0.0276012	0.408192	0.493321	0.0430479	-0.0144224
	0.916872	0.287918	Color2 [A=255, R=169, G=169, B=169]	1	4		P05155	Plasma protease C1 inhibitor OS=Homo sapiens OX=9606 GN=SERPING1 PE=1 SV=2	0.825692	0.683049	0.754975	1.11331	1.7366	1.65643	0.344259	0.169447	0.0877953	-0.585158	0.683812	0.662173	0.831697	0.326467	1.52157	1.19536	1.14634	1.01432	0.879629	0.746332	0.712722	0.476514	0.232625	-0.106371	1.03223	1.32287	0.410891	0.245498	1.0757	1.10426	0.981434	-1.00323	0.089324	-0.148494	0.81611	0.23208	1.10989	1.22432	0.0835218	0.143855
	0.626042	-0.11266	Color2 [A=255, R=169, G=169, B=169]	1	4		P08185	Corticosteroid-binding globulin OS=Homo sapiens OX=9606 GN=SERPINA6 PE=1 SV=1	0.822068	0.449403	-0.0154715	-0.0244265	-0.00288296	-0.00733852	0.0614376	0.00660706	-0.0205421	0.137366	-0.170274	0.0277681	0.251545	0.0645475	-0.117015	0.0392447	0.429222	0.335607	-0.142893	-0.0298977	-0.0298529	-0.0142031	0.40043	0.255875	0.0616655	0.196909	0.231848	0.0239248	-0.0271072	0.0293236	1.25817	0.318027	0.384215	0.484282	0.432364	0.271645	0.505518	0.212056	-0.368083	-0.279733
	2.03131	0.26759	Color2 [A=255, R=169, G=169, B=169]	1	4		P02743	Serum amyloid P-component OS=Homo sapiens OX=9606 GN=APCS PE=1 SV=2	0.81174	0.479865	0.761661	0.604266	1.27773	1.20785	1.01007	1.0492	0.862619	0.766311	1.14467	0.982631	1.23719	1.53884	0.985999	0.922351	0.453094	0.484332	0.716354	1.17782	0.610217	0.595588	0.262889	0.736586	0.837163	1.15114	0.871754	0.777299	0.414488	0.677025	1.23112	0.429983	-0.0941687	0.277274	0.560697	0.522482	0.553473	0.651633	1.08411	0.972068
	0.583441	0.0989013	Color2 [A=255, R=169, G=169, B=169]	1	4		P03952	Plasma kallikrein OS=Homo sapiens OX=9606 GN=KLKB1 PE=1 SV=1	0.800075	0.280215	0.196998	0.210132	-0.0965261	-0.165504	0.103918	-0.00660706	0.514574	0.591586	0.314036	0.424115	0.642538	0.357223	-0.247853	0.00656033	0.310673	0.319695	0.349447	0.223902	-0.124019	-0.296424	0.248349	-0.00164986	0.000525475	0.108971	0.170549	-0.00305462	-0.0291042	-0.0450001	0.594648	0.0573292	0.619182	0.898685	0.211143	0.172581	0.195559	0.00701046	0.0972548	0.268638
	1.93872	0.392142	Color2 [A=255, R=169, G=169, B=169]	1	4		P35542	Serum amyloid A-4 protein OS=Homo sapiens OX=9606 GN=SAA4 PE=1 SV=2	0.794765	0.518325	0.00784397	0.177527	-0.483378	-0.673743	0.142803	0.141996	-0.377247	-0.371785	0.00840855	0.107371	0.157003	0.167159	-0.042346	-0.0922079	-0.143726	-0.00249004	0.35207	0.840273	-1.06906	-1.02813	-0.364205	-0.32478	-1.09446	-0.358618	0.00785255	-0.212955	-0.869268	-1.08583	-0.191507	-0.389851	0.255631	0.480186	-0.669473	-0.819019	0.332277	0.373097	0.238957	0.174924
	0.601089	-0.240207	Color2 [A=255, R=169, G=169, B=169]	1	4		P02766	Transthyretin OS=Homo sapiens OX=9606 GN=TTR PE=1 SV=1	0.744397	1.37677	0.646626	0.0440073	0.00288296	0.415774	1.00506	0.721281	0.889717	0.479304	1.74845	1.17931	0.849766	2.53445	0.714089	1.35948	0.818104	0.350335	0.491215	1.90506	0.724982	2.92111	1.13884	1.48942	0.565131	0.987244	1.11419	0.922387	0.639391	0.583689	0.234098	1.48132	1.35966	0.739425	0.97877	2.12891	0.880251	0.374063	2.21453	1.60281
	0.295791	0.0400569	Color2 [A=255, R=169, G=169, B=169]	1	4		P00736	Complement C1r subcomponent OS=Homo sapiens OX=9606 GN=C1R PE=1 SV=2	0.713733	0.608308	0.555633	0.573693	0.743392	0.763141	0.291121	0.355444	0.488571	0.285462	0.665721	0.711509	0.943846	0.741799	0.836358	0.70835	0.863859	0.602662	0.74349	0.363647	0.691216	0.381721	0.713172	0.703001	0.630134	0.807816	0.73089	0.57982	0.441771	0.508326	0.584816	0.330639	0.751201	0.800616	0.383216	0.168699	0.809292	0.797435	0.387063	0.557759
	0.22131	0.0663832	Color2 [A=255, R=169, G=169, B=169]	1	4		P02750	Leucine-rich alpha-2-glycoprotein OS=Homo sapiens OX=9606 GN=LRG1 PE=1 SV=2	0.663522	0.682452	0.605544	0.652738	1.13042	0.972146	0.256577	-0.00860214	1.00345	1.00387	1.21969	0.997329	0.715124	0.822341	0.381255	0.130326	0.896399	0.829549	0.0740128	-0.00832748	0.725175	0.312224	0.605994	0.973877	0.271855	0.598478	-0.0451336	-0.196218	0.272827	0.74519	0.638674	0.643023	0.0798674	0.27838	0.521585	0.660643	1.15544	1.00192	1.24035	1.208
	0.522759	-0.399442	Color2 [A=255, R=169, G=169, B=169]	1	4		P20742	Pregnancy zone protein OS=Homo sapiens OX=9606 GN=PZP PE=1 SV=4	0.660674	0.339713	-1.62325	-1.89692	-2.1293	-1.86878	-0.832443	-0.983229	-0.115511	-0.160724	-1.29955	-1.44181	-2.4182	-2.91761	-1.30158	-1.17931	-1.73564	-2.07667	-2.06261	-2.25383	-1.30705	-1.2823	-0.562396	-0.3197	-2.59114	-2.53919	-2.75452	-2.74742	-1.82345	-1.83462	1.72032	2.06982	-0.810277	-0.883248	-0.0795679	0.123566	0.249128	0.21252	-2.44315	-1.70506
	3.48543	0.286428	Color2 [A=255, R=169, G=169, B=169]	1	4		P07357	Complement component C8 alpha chain OS=Homo sapiens OX=9606 GN=C8A PE=1 SV=2	0.418298	0.024497	0.041894	-0.0317793	-0.227839	-0.284186	0.0651569	0.0867195	0.0028801	-0.0475664	-0.0222826	-0.12054	-0.286304	-0.205773	-0.243243	-0.158687	-0.0766048	-0.123273	0.0049572	0.127243	-0.447474	-0.556293	-0.135386	0.0888653	-0.139016	-0.116066	-0.343166	-0.584765	-0.432339	-0.242777	-0.385353	-0.975277	0.0284033	0.028203	-0.739331	-0.719336	-0.257776	-0.333577	-0.349015	-0.173516
	2.10471	0.265874	Color2 [A=255, R=169, G=169, B=169]	1	4		P07358	Complement component C8 beta chain OS=Homo sapiens OX=9606 GN=C8B PE=1 SV=3	0.359517	0.161767	0.0479822	-0.087266	-0.181445	-0.285933	-0.227987	0.166063	0.0250473	-0.0327082	0.124637	-0.217027	-0.137087	-0.472434	-0.13083	0.0510378	0.0877342	-0.139846	0.0786648	0.255251	-0.30601	-0.54847	0.0363703	-0.0903492	0.183299	0.274643	-0.506018	-0.75335	-0.599049	-0.572289	-0.27504	-0.724297	0.342452	0.0782175	-0.647302	-0.937483	-0.117384	-0.451587	-0.31677	0.0580778
	1.1894	-0.117639	Color2 [A=255, R=169, G=169, B=169]	1	4		P02747	Complement C1q subcomponent subunit C OS=Homo sapiens OX=9606 GN=C1QC PE=1 SV=3	0.284762	0.339665	0.436074	0.285592	0.64256	0.645875	0.408825	0.354994	0.240244	0.330396	0.662356	0.573163	0.784079	0.664998	0.669145	0.529552	0.950142	0.767562	0.30336	0.253656	0.641448	0.641202	0.635936	0.697412	0.491324	0.928114	0.71489	0.646543	0.633884	0.837393	0.700178	0.247278	0.460229	0.601918	0.572698	0.159277	0.815042	0.760104	0.627427	0.66748
	1.27835	0.229626	Color2 [A=255, R=169, G=169, B=169]	1	4		P36955	Pigment epithelium-derived factor OS=Homo sapiens OX=9606 GN=SERPINF1 PE=1 SV=4	0.21436	0.0201616	-0.481395	-0.336341	0.505858	0.412322	0.173859	0.177557	-0.027256	0.0327082	0.544053	0.550838	0.845316	0.707368	0.00666142	0.13029	0.550013	0.293124	0.270704	0.20611	-0.0675516	0.0142031	-0.245524	-0.28274	0.320334	0.636766	-0.00766754	-0.214438	-0.255089	-0.194132	-0.406301	-0.935081	0.0559053	0.070508	0.145957	-0.14138	0.13851	0.170558	0.589303	0.811645
	0.150598	0.05511	Color2 [A=255, R=169, G=169, B=169]	1	4		P00748	Coagulation factor XII OS=Homo sapiens OX=9606 GN=F12 PE=1 SV=3	0.190299	-0.03304	-0.275218	-0.490617	-0.405673	-0.700004	-1.06089	-0.939543	-1.08427	-1.12853	-0.371131	-0.430688	0.113581	0.223773	-1.03545	-0.505036	-0.357059	-0.422688	-0.118389	0.231384	-0.247331	0.0168715	-0.882936	-0.974392	-0.799867	-0.450073	-0.610008	-0.673022	-1.45343	-1.22104	0.238417	-0.113478	0.00766659	0.217965	-0.169099	-0.501625	-0.750376	-0.661923	-0.659301	-0.0144014
	0.0985657	-0.0435889	Color2 [A=255, R=169, G=169, B=169]	1	4		P51884	Lumican OS=Homo sapiens OX=9606 GN=LUM PE=1 SV=2	0.186786	-0.192733	-0.872861	-0.707408	0.160607	-0.54382	-0.611967	-0.685616	-1.41345	-1.24178	0.100387	-0.548905	-0.379356	-1.10678	-0.587022	-0.142903	-0.565536	-1.38214	-1.13807	-1.29594	-1.40753	-1.51437	-0.10094	-0.335491	-0.200322	-0.109735	-1.07384	-1.12221	-0.112328	0.135532	-0.555328	-1.58378	-0.419951	-0.275367	-0.0482721	-0.284081	-0.821907	-0.0754957	-0.918178	-1.27314
	3.27252	0.29257	Color2 [A=255, R=169, G=169, B=169]	1	4		P22792	Carboxypeptidase N subunit 2 OS=Homo sapiens OX=9606 GN=CPN2 PE=1 SV=3	0.178777	-0.00147152	-0.00784397	-0.0387354	-0.0138712	-0.323306	-0.285339	-0.363668	-0.142172	-0.222177	-0.152568	0.00451565	-0.140779	-0.229262	-0.00612736	-0.245328	0.0871525	0.190513	-0.438534	-0.108395	-0.708989	-1.04705	-0.459559	-0.128637	-0.403834	-0.186684	-0.17469	-0.379668	-0.72381	-0.62941	-0.101456	-0.217743	-0.633098	-0.185384	0.0217619	-0.343813	-0.198565	-0.165095	-0.448201	-0.9961
	0.0600773	-0.0101862	Color2 [A=255, R=169, G=169, B=169]	1	4		P09871	Complement C1s subcomponent OS=Homo sapiens OX=9606 GN=C1S PE=1 SV=1	0.173467	0.0262518	-0.0793657	-0.16554	-0.00526714	0.00733852	-0.270012	-0.447296	-0.221439	-0.343282	0.044404	-0.00451565	0.297256	0.129586	0.0457468	-0.0649595	0.25108	-0.308375	-0.110788	-0.163527	0.00510883	0.0355406	0.0195341	-0.053875	-0.01682	-0.0137997	0.0651646	-0.0615072	-0.244991	-0.0293236	0.0212688	-0.501234	0.0695143	0.162419	-0.15661	-0.365984	0.327991	0.195939	-0.159534	-0.304317
	1.38316	-0.28005	Color2 [A=255, R=169, G=169, B=169]	1	4		P01619	Immunoglobulin kappa variable 3-20 OS=Homo sapiens OX=9606 GN=IGKV3-20 PE=1 SV=2	0.113463	-0.242244	0.957953	0.676986	0.910167	0.847644	1.21251	1.12128	1.21709	1.11141	1.10977	1.15848	0.747822	0.722632	1.05459	1.08525	1.45113	1.09116	0.565046	0.671606	2.09986	2.10081	1.38967	1.36766	1.14187	1.28143	1.21346	0.895389	1.23572	1.5564	1.2587	0.694532	0.719748	0.54522	1.36225	1.13046	1.13159	0.682752	0.505252	0.871995
	0.161853	-0.0593461	Color2 [A=255, R=169, G=169, B=169]	1	4		A0A075B6S2	Immunoglobulin kappa variable 2D-29 OS=Homo sapiens OX=9606 GN=IGKV2D-29 PE=3 SV=1	0.0198336	-0.617368	1.31482	1.23821	0.983056	1.14164	0.594696	0.593746	1.11099	1.33056	0.567716	0.635982	0.546717	0.501658	0.85995	0.526004	1.38192	0.916392	0.396595	0.382027	1.3463	1.27012	0.583463	0.421432	0.543899	0.58816	0.854792	0.881486	1.39184	1.28172	0.607164	-0.236933	0.144134	0.219949	1.27258	0.973373	0.98078	1.05912	0.664062	0.764638
	0.230226	0.0672102	Color2 [A=255, R=169, G=169, B=169]	1	4		Q06033	Inter-alpha-trypsin inhibitor heavy chain H3 OS=Homo sapiens OX=9606 GN=ITIH3 PE=1 SV=2	-0.0198336	-0.100469	0.0512838	0.247052	0.0298414	0.0327902	-0.559509	-0.557865	-0.488312	-0.602996	-0.172275	-0.132854	-0.753263	-0.535695	-0.953015	-0.956456	0.239166	0.111529	-0.593346	-0.704216	0.128177	-0.0213995	0.129123	0.124155	-0.652022	-0.552254	-0.920551	-1.20381	-0.622845	-0.552731	-0.685184	-0.858976	-0.590724	-0.561151	-0.0217619	-0.222809	-0.0364208	-0.403979	-0.0430479	-0.194432
	0.69484	0.140916	Color2 [A=255, R=169, G=169, B=169]	1	4		P29622	Kallistatin OS=Homo sapiens OX=9606 GN=SERPINA4 PE=1 SV=3	-0.0841455	-0.129821	-0.850823	-1.06659	-1.15162	-1.39552	-0.894974	-0.868418	-0.684992	-1.01785	-0.725051	-0.387898	-0.271132	-0.437537	-0.456185	-0.489537	-0.66783	-0.576598	-0.851448	-0.821476	-1.1611	-0.733602	-0.570306	-0.926788	-0.793389	-0.555643	-0.380236	-0.527263	-1.36267	-1.29979	-0.560049	-0.663412	-0.577018	-0.443845	-0.865363	-1.09583	-0.674242	-0.682464	-1.1353	-1.63948
	0.388624	-0.100435	Color2 [A=255, R=169, G=169, B=169]	1	4		P01780	Immunoglobulin heavy variable 3-7 OS=Homo sapiens OX=9606 GN=IGHV3-7 PE=1 SV=2	-0.0999727	-0.631179	0.919293	0.813985	0.584638	0.530042	0.851334	0.795748	0.733778	0.802711	0.323995	0.489709	0.577408	0.256774	0.632112	0.4472	0.926916	0.632602	0.0691795	0.15489	1.12522	0.911939	1.06582	1.06317	0.56973	0.589499	0.762636	0.443456	0.758062	0.763842	0.397173	-0.0573292	0.0884409	-0.25262	0.8581	0.454176	0.545128	0.38553	0.478385	0.869508
	0.695838	0.1695	Color2 [A=255, R=169, G=169, B=169]	1	4		P12259	Coagulation factor V OS=Homo sapiens OX=9606 GN=F5 PE=1 SV=4	-0.107522	0.0167837	-0.424041	-0.373712	0.104592	-0.834363	-1.02328	-1.00931	-0.460613	-0.524976	-0.780553	-0.348058	-0.49674	-1.69685	-0.980006	-0.346957	-0.153414	-0.555938	-0.834059	-0.618093	-0.680795	-1.99497	-0.441918	-0.800673	-0.766334	-0.437544	-0.496677	-0.647454	-0.387863	-0.78521	-0.817373	-1.08192	-0.675826	-0.175004	-0.372794	-1.15664	-0.842863	-0.647281	-1.22087	-0.407094
	0.250916	-0.11439	Color2 [A=255, R=169, G=169, B=169]	1	4		P02775	Platelet basic protein OS=Homo sapiens OX=9606 GN=PPBP PE=1 SV=3	-0.145078	1.06665	1.06792	1.20734	-0.430346	0.428971	0.618465	1.0836	-0.130455	0.554044	0.931701	1.24777	1.00953	0.568921	0.961726	1.07935	-1.53626	1.36628	1.23761	0.443283	1.16852	1.0882	0.558686	1.31661	-0.000525475	0.274351	0.472929	0.617225	0.899088	1.163	0.794266	0.964758	0.419782	1.48536	0.881833	1.76811	0.0972462	-0.00701046	0.505637	0.45073
	0.491931	-0.298581	Color2 [A=255, R=169, G=169, B=169]	1	4		P60709	Actin, cytoplasmic 1 OS=Homo sapiens OX=9606 GN=ACTB PE=1 SV=1	-0.14914	2.97089	2.80738	3.346	0.0552931	2.62574	1.50019	2.58103	1.42178	1.86902	2.10394	2.56758	2.35811	1.93087	2.8754	2.4444	-1.01017	2.40136	2.65891	1.91377	2.62445	2.23231	2.49702	2.9797	1.45466	1.12434	1.92645	2.85828	3.01667	2.5206	2.05627	3.39026	1.79907	2.75379	2.05242	3.19541	1.14755	0.931922	2.3327	2.35009
	0.749183	0.253006	Color2 [A=255, R=169, G=169, B=169]	1	4		P00739	Haptoglobin-related protein OS=Homo sapiens OX=9606 GN=HPR PE=2 SV=2	-0.166314	-0.570308	-0.190293	0.0101061	0.188516	0.0886221	-0.0541553	-0.109913	0.0951252	0.0716162	-0.289723	-0.143819	0.268978	-0.177472	-0.407611	-0.7891	-0.159367	-0.0615892	-1.4752	-1.40035	0.288918	-0.139667	-1.74535	-1.45972	0.476392	0.625124	-0.494888	-0.576549	-1.60125	-0.699429	-0.0406723	-0.477655	-0.628512	-0.445945	-1.34543	-0.552479	-0.846283	-0.887576	0.236741	-0.0181513
	0.471168	0.180859	Color2 [A=255, R=169, G=169, B=169]	1	4		P0C0L4	Complement C4-A OS=Homo sapiens OX=9606 GN=C4A PE=1 SV=2	-0.490817	-0.68576	-0.981696	-1.10696	-0.900712	-1.24133	-1.06566	-0.825775	-0.312853	-0.592685	-0.50398	-0.225244	-0.366682	-0.35633	-1.59638	-1.47237	-1.38745	-1.77049	0.0446472	-0.0641022	-1.16797	-1.66464	-0.334682	-0.0848389	-0.764098	-0.76696	0.00766754	-0.168477	-0.931953	-0.994417	-1.66429	-2.10835	-1.24184	-1.25312	-0.0639982	-0.253353	-1.3544	-1.73322	-1.64327	-1.33359
	0.934123	0.174414	Color2 [A=255, R=169, G=169, B=169]	1	4		O75882	Attractin OS=Homo sapiens OX=9606 GN=ATRN PE=1 SV=2	-0.512225	-1.10151	-1.54587	-1.31215	-1.14907	-1.5905	-1.11085	-1.09098	-1.30129	-1.42344	-0.879443	-0.858289	-0.680464	-1.07707	-0.639678	-0.786231	-1.46576	-2.10465	-1.16139	-1.05967	-1.23556	-1.36815	-1.42866	-0.925657	-1.29756	-1.00593	-1.27396	-1.56725	-1.60671	-1.88672	-0.937246	-1.75943	-1.14441	-0.687457	-1.09289	-1.58934	-1.21762	-1.17573	-1.59076	-1.54778
	1.77028	-0.178642	Color2 [A=255, R=169, G=169, B=169]	1	4		P02745	Complement C1q subcomponent subunit A OS=Homo sapiens OX=9606 GN=C1QA PE=1 SV=2	-0.586265	-0.640754	-0.653266	-0.829972	-0.213078	-0.109406	-0.67075	-0.58824	-0.519678	-0.441113	-0.568017	-0.352544	-0.0903225	-0.192992	-0.184417	-0.352422	0.256697	-0.110194	-0.746977	-0.525517	-0.171123	-0.0635405	-0.159947	-0.126499	-0.120975	-0.0043869	-0.21405	-0.381619	-0.271288	-0.183569	-0.0212688	-0.541668	-0.466125	-0.43686	-0.295741	-0.474979	-0.0640564	-0.238444	-0.230567	-0.07969
	1.28348	-0.694548	Color2 [A=255, R=169, G=169, B=169]	1	4		P02746	Complement C1q subcomponent subunit B OS=Homo sapiens OX=9606 GN=C1QB PE=1 SV=3	-0.631787	-0.847997	-0.556756	-0.382031	-0.0807295	-0.0657587	-0.261219	-0.633806	1.48328	1.82463	1.1469	1.06275	-0.0180912	0.0945902	0.00612736	-0.53148	0.0558968	0.0661306	1.29231	1.66401	-0.00510883	-0.0349379	2.07493	1.98628	2.66224	2.85913	-0.120581	-0.44	-0.187616	-0.15436	2.36648	1.66237	-0.427869	-0.389527	-0.421556	-0.745344	1.98969	2.46571	1.7105	1.72751
	0.942186	-0.156667	Color2 [A=255, R=169, G=169, B=169]	1	4		P05452	Tetranectin OS=Homo sapiens OX=9606 GN=CLEC3B PE=1 SV=3	-0.660129	-0.824695	-1.56323	-1.71823	-1.32692	-1.30905	-1.3034	-1.43683	-1.39667	-1.03144	-0.876569	-1.09099	-0.861664	-1.17674	-1.24469	-1.10391	-0.738308	-1.20372	-1.0267	-0.998045	-1.28615	-1.36501	-0.874553	-1.14059	-0.734445	-0.436813	-0.746168	-0.71124	-1.29277	-0.872644	-0.788599	-1.40929	-0.870324	-0.787776	-0.940803	-1.11811	-0.604229	-0.669086	-1.71316	-1.39684
	0.202772	0.130751	Color2 [A=255, R=169, G=169, B=169]	1	4		Q03591	Complement factor H-related protein 1 OS=Homo sapiens OX=9606 GN=CFHR1 PE=1 SV=2	-0.791657	-1.0546	-1.42682	-1.56954	-1.94626	-2.09222	-1.34526	-1.09725	-0.847301	-1.22155	-1.91966	-2.2115	-1.93711	-1.61856	-2.06558	-1.80658	-1.08978	-1.59524	-1.90685	-1.6683	-1.17038	-0.820291	-2.239	-2.53199	-0.894677	-1.10048	-1.7587	-1.87319	-1.34033	-1.38768	-4.23826	-5.04638	-1.35066	-1.24724	-0.71997	-1.38025	-1.28078	-1.38679	-1.037	-1.0226
	1.39602	-0.313473	Color2 [A=255, R=169, G=169, B=169]	1	4		P01624	Immunoglobulin kappa variable 3-15 OS=Homo sapiens OX=9606 GN=IGKV3-15 PE=1 SV=2	-0.826465	-1.1935	-0.800834	-1.02569	0.137467	0.370553	0.254129	0.24198	0.140316	0.259065	-0.314433	-0.0978022	-0.10582	0.0637598	0.351449	0.123565	0.529354	0.106805	-0.130459	-0.294613	0.636106	0.75974	0.0901079	0.00164986	0.0379992	-0.00806808	0.40349	0.121694	0.672537	0.806574	0.312981	-0.433857	-0.509938	-0.519181	1.01385	0.483442	0.197964	0.213101	-0.278617	0.0567122
	0.00253875	-0.00134964	Color2 [A=255, R=169, G=169, B=169]	1	4		O75636	Ficolin-3 OS=Homo sapiens OX=9606 GN=FCN3 PE=1 SV=2	-0.856101	-1.02905	-2.42051	-2.5283	-1.45913	-1.78515	-1.88801	-1.29707	-0.550362	-1.51335	-0.649514	-1.09812	-1.10541	-0.0637598	-2.56726	-1.81421	-1.2945	-1.30308	-1.85034	-0.746653	-1.30749	-0.11527	-1.91243	-1.51693	-1.25741	-1.01138	-1.00931	-1.15613	-1.23759	-1.58333	-1.19835	-0.890648	-1.51075	-1.03788	-1.60842	-1.85007	-1.96543	-1.66643	-1.77693	-2.18071
	0.859725	0.157807	Color2 [A=255, R=169, G=169, B=169]	1	4		O14791	Apolipoprotein L1 OS=Homo sapiens OX=9606 GN=APOL1 PE=1 SV=5	-0.906186	-0.968431	-0.908519	-0.842204	-0.856387	-0.763068	-0.658337	-0.548887	-0.877945	-0.843183	-0.928449	-0.872451	-0.644953	-0.831069	-1.34901	-0.756	-0.606363	-0.845525	-1.47437	-1.4544	-0.752854	-0.911119	-1.94461	-1.63684	-0.553823	-0.481724	-1.10166	-1.27172	-1.09869	-1.11103	-0.480034	-0.768192	-1.3598	-0.992652	-1.43255	-1.53679	-0.98023	-1.04214	-0.894963	-0.74047
	0.62938	0.157851	Color2 [A=255, R=169, G=169, B=169]	1	4		P35858	Insulin-like growth factor-binding protein complex acid labile subunit OS=Homo sapiens OX=9606 GN=IGFALS PE=1 SV=1	-0.941611	-0.619025	-0.772809	-0.879703	-1.62761	-1.35785	-0.471661	-0.461937	-1.33792	-1.38801	-0.781407	-0.866109	-1.17624	-1.01601	-1.18955	-0.619164	-1.46291	-0.854007	-0.996687	-0.917686	-2.14661	-1.89814	-2.07253	-1.45772	-1.0304	-0.740971	-0.776096	-0.865275	-1.58675	-1.25605	-0.828102	-1.3431	-0.855132	-0.879151	-0.455014	-0.715755	-1.1375	-0.883105	-1.30501	-0.662503
	1.49804	-0.490213	Color2 [A=255, R=169, G=169, B=169]	1	4		P01591	Immunoglobulin J chain OS=Homo sapiens OX=9606 GN=JCHAIN PE=1 SV=4	-1.02629	-1.69478	1.41457	1.33289	1.03673	1.03079	1.2602	1.09186	0.79126	0.760127	0.513009	0.590247	0.147528	-0.19929	1.46175	1.21969	0.800617	0.601924	0.0608959	0.00832748	1.637	1.79995	1.57102	1.44724	0.993592	0.863638	0.613754	0.386334	1.74546	1.73044	1.44059	0.912979	-0.0336943	0.152623	1.09049	0.603157	0.857584	0.729074	1.18055	1.28453
	0.0852361	0.0342092	Color2 [A=255, R=169, G=169, B=169]	1	4		Q14520	Hyaluronan-binding protein 2 OS=Homo sapiens OX=9606 GN=HABP2 PE=1 SV=1	-1.11871	-1.52607	-1.50275	-2.27868	-2.55957	-1.93993	-1.83808	-2.11958	-2.92461	-2.53323	-2.19914	-2.90369	-1.53096	-1.99951	-2.81785	-2.57603	-2.56801	-2.11754	-1.91836	-2.35272	-2.49611	-2.27841	-1.57904	-1.73634	-2.55085	-1.89158	-2.36901	-1.9842	-1.93618	-2.26583	-2.05286	-2.16428	-1.91489	-1.54948	-2.46583	-3.26023	-1.93882	-1.89244	-3.01679	-2.66605
	0.214911	-0.0723895	Color2 [A=255, R=169, G=169, B=169]	1	4		P05543	Thyroxine-binding globulin OS=Homo sapiens OX=9606 GN=SERPINA7 PE=1 SV=2	-1.34005	-1.4048	-1.85625	-1.87204	-1.45589	-1.39097	-1.92521	-2.07512	-2.45683	-2.92712	-1.27914	-1.32788	-1.02347	-1.08183	-1.49842	-1.57019	-0.877163	-1.23283	-1.83407	-1.71216	-1.45583	-1.61086	-1.28907	-1.38379	-1.59428	-1.46447	-1.57226	-2.06097	-1.79212	-1.71389	-0.851845	-1.16399	-1.40358	-1.37603	-1.24654	-1.45506	-1.19115	-1.3104	-2.21322	-2.54427
	0.124922	0.086074	Color2 [A=255, R=169, G=169, B=169]	1	4		P02042	Hemoglobin subunit delta OS=Homo sapiens OX=9606 GN=HBD PE=1 SV=2	-1.37552	-2.76884	-2.65478	-2.46856	-3.88778	-1.86006	-0.849106	-2.63337	-2.58094	-2.02281	-3.04985	-2.3436	-2.51269	-0.288457	-3.0756	-3.31871	-3.39061	-2.21799	-0.354464	-2.94714	-3.1553	-2.62202	-2.82447	-2.09678	-2.44615	-2.24249	-2.18346	-1.57309	-2.8952	-2.40347	-2.49854	-2.55658	-3.53348	-3.40406	-1.50374	-2.52176	-2.31418	-2.91418	-2.23591	-0.397489
	0.525388	0.188334	Color2 [A=255, R=169, G=169, B=169]	1	4		P23142	Fibulin-1 OS=Homo sapiens OX=9606 GN=FBLN1 PE=1 SV=4	-1.55131	-1.25855	-2.17667	-2.48041	-1.76421	-1.71833	-3.703	-2.69849	-2.2449	-2.45581	-2.15605	-2.13115	-2.36111	-3.01829	-3.56515	-2.72773	-1.00453	-1.86674	-1.51797	-1.5893	-3.23932	-2.57425	-2.11332	-2.18642	-2.31019	-2.72284	-2.41418	-2.09859	-2.18852	-1.69493	-2.42973	-2.98114	-1.95687	-2.23084	-2.2306	-2.44543	-2.16023	-2.28479	-2.71249	-2.78171
	1.07485	-0.209481	Color2 [A=255, R=169, G=169, B=169]	1	4		P25311	Zinc-alpha-2-glycoprotein OS=Homo sapiens OX=9606 GN=AZGP1 PE=1 SV=2	-1.55997	-1.72172	-1.96103	-2.37934	-1.45076	-1.45422	-1.77012	-2.07299	-2.0495	-1.98324	-1.64961	-1.87183	-1.76914	-2.05911	-1.95649	-1.96457	-2.30478	-2.2829	-1.85489	-1.82127	-2.10413	-2.34923	-2.27018	-2.2002	-1.36918	-1.25253	-1.7084	-1.70012	-1.91545	-1.89496	-1.59477	-2.11971	-1.44211	-1.44825	-1.34327	-1.54407	-1.85064	-2.11585	-0.622733	-0.902076
	0.4876	-0.208142	Color2 [A=255, R=169, G=169, B=169]	1	4		P80748	Immunoglobulin lambda variable 3-21 OS=Homo sapiens OX=9606 GN=IGLV3-21 PE=1 SV=2	-1.60667	-1.78749	-0.384427	-0.935308	-0.987737	-0.748303	-1.6318	-1.24976	-1.25779	-1.15788	-0.749764	-1.00318	-1.52088	-1.56951	0.525292	0.183003	-0.0558968	-0.434644	-1.20592	-1.3772	-0.386592	-0.444257	-0.289758	-0.409704	-0.873553	-0.722692	0.200983	0.0928011	0.0283012	0.179976	-0.384882	-1.45679	-1.0481	-1.06608	-1.77639	-2.45882	-1.1346	-1.18715	-1.01767	-0.638043
	1.52076	0.346255	Color2 [A=255, R=169, G=169, B=169]	1	4		P05160	Coagulation factor XIII B chain OS=Homo sapiens OX=9606 GN=F13B PE=1 SV=3	-1.84217	-1.80773	-2.03812	-2.21788	-1.47866	-2.42278	-2.16291	-2.02706	-2.46736	-2.36497	-1.84667	-1.64884	-1.59131	-3.53302	-1.94976	-1.88738	-2.26968	-2.51328	-2.30202	-2.17439	-2.77488	-3.63008	-2.07465	-2.76807	-2.53875	-2.04597	-2.00385	-2.31159	-2.16377	-2.31356	-2.0807	-3.12841	-2.16392	-2.07787	-1.3746	-2.9053	-2.8576	-2.95731	-3.05188	-2.24832
	1.83219	-0.427905	Color2 [A=255, R=169, G=169, B=169]	1	4		P01764	Immunoglobulin heavy variable 3-23 OS=Homo sapiens OX=9606 GN=IGHV3-23 PE=1 SV=2	-1.90482	-2.35743	-0.844846	-0.711926	-0.880305	-0.586406	-1.01748	-1.04586	-1.12338	-0.762254	-2.08296	-1.88677	-2.0416	-2.0035	-0.646697	-1.00482	-0.744024	-1.00016	-2.30104	-2.1986	-0.260369	-0.231894	-1.01811	-1.22047	-1.27883	-1.40892	-0.806574	-1.08861	-1.0573	-1.17813	-1.04578	-1.81455	-0.708816	-0.835465	-0.37507	-0.885805	-0.603447	-0.940784	-1.05067	-0.777188
	0.461704	0.156856	Color2 [A=255, R=169, G=169, B=169]	1	4		P36980	Complement factor H-related protein 2 OS=Homo sapiens OX=9606 GN=CFHR2 PE=1 SV=1	-2.03847	-2.06112	-3.96455	-3.73946	-2.12526	-2.17047	-2.45824	-2.25018	-2.23589	-2.2127	-2.02339	-2.01885	-1.44577	-1.66703	-1.90291	-1.76494	-2.07582	-2.48271	-1.81771	-1.48321	-2.324	-2.32199	-2.41877	-2.6449	-2.14556	-2.17801	-2.6548	-2.72581	-2.62229	-2.63784	-1.94203	-2.45705	-2.52407	-2.34248	-1.76122	-1.97848	-1.63791	-1.87489	-2.89723	-2.98649
	0.949674	0.12792	Color2 [A=255, R=169, G=169, B=169]	1	4		P49908	Selenoprotein P OS=Homo sapiens OX=9606 GN=SELENOP PE=1 SV=3	-2.11478	-2.31807	-2.76488	-2.84669	-2.45207	-2.43377	-2.56249	-2.45471	-2.43043	-2.53611	-2.39005	-2.18522	-2.00718	-1.94866	-2.44702	-2.64665	-2.22184	-2.47674	-2.59268	-2.27959	-2.84137	-2.93455	-2.65752	-2.68386	-2.34455	-2.10743	-2.18805	-2.23302	-2.91943	-2.74418	-2.53198	-2.75084	-2.37621	-2.35681	-2.66915	-2.84408	-2.28722	-2.62311	-2.258	-2.31666
	0.491566	-0.259533	Color2 [A=255, R=169, G=169, B=169]	1	4		P02776	Platelet factor 4 OS=Homo sapiens OX=9606 GN=PF4 PE=1 SV=2	-2.17909	-0.615256	-0.670138	-0.332812	-2.03483	-0.810214	-0.762924	-0.685081	-1.9959	-1.19657	-0.733815	-0.501197	-0.926828	-1.09239	-0.355899	-0.723809	-4.6472	-0.148648	-0.576492	-0.87348	-0.240787	-0.179938	-0.933778	-0.533998	-1.75211	-1.80734	-1.18804	-0.989362	-0.896553	-0.520533	-0.674717	0.0654964	-0.977536	-0.454532	-0.847693	0.250761	-1.659	-1.4522	-0.827079	-1.05298
	0.302458	0.0646725	Color2 [A=255, R=169, G=169, B=169]	1	4		P15169	Carboxypeptidase N catalytic chain OS=Homo sapiens OX=9606 GN=CPN1 PE=1 SV=1	-2.17963	-2.25402	-2.1884	-2.12817	-2.0158	-2.1571	-2.52523	-2.39332	-2.8467	-2.38609	-2.07343	-1.94842	-2.16202	-2.26332	-2.28316	-2.25927	-2.59174	-2.41044	-2.71714	-2.83535	-2.36375	-3.01	-2.2087	-2.16688	-2.45285	-2.90957	-1.97751	-2.46263	-2.70636	-2.16273	-1.98489	-2.30656	-2.39657	-1.81697	-2.46292	-2.5341	-2.18124	-2.17704	-2.59806	-3.03289
	1.23774	-0.32039	Color2 [A=255, R=169, G=169, B=169]	1	4		A0A0B4J1X5	Immunoglobulin heavy variable 3-74 OS=Homo sapiens OX=9606 GN=IGHV3-74 PE=3 SV=1	-2.19886	-2.64255	-0.0476198	-0.236846	-0.846433	-1.17777	-1.07501	-1.2052	-1.03653	-0.914622	-1.23292	-1.12262	-1.42336	-1.6251	-0.281425	-0.835986	-0.696583	-1.03043	-1.99743	-1.77156	-0.616185	-0.777568	-0.195182	-0.315449	-1.14035	-0.954443	-0.734499	-0.848401	-1.08302	-0.753723	-0.975271	-1.61378	-1.07979	-1.31783	-0.320907	-0.693176	-0.874451	-0.76674	-1.05193	-0.878364
	0.555259	0.101122	Color2 [A=255, R=169, G=169, B=169]	1	4		Q96IY4	Carboxypeptidase B2 OS=Homo sapiens OX=9606 GN=CPB2 PE=1 SV=2	-2.23631	-1.80921	-2.44124	-2.46761	-2.5163	-2.36434	-2.42727	-2.48476	-2.80894	-2.22413	-2.24868	-2.21882	-1.81715	-2.05987	-2.3925	-2.1458	-2.89563	-2.22614	-2.15718	-1.94296	-2.73123	-2.37588	-1.97679	-2.21288	-2.59339	-2.05242	-2.49008	-2.76038	-2.85201	-2.56734	-2.73571	-2.90457	-2.02336	-2.07325	-2.28536	-2.45291	-2.31311	-2.33819	-1.98422	-2.18418
	1.57341	0.431367	Color2 [A=255, R=169, G=169, B=169]	1	4		P15814	Immunoglobulin lambda-like polypeptide 1 OS=Homo sapiens OX=9606 GN=IGLL1 PE=1 SV=1	-2.24213	-2.35541	-3.04889	-3.26907	-2.82764	-2.97856	-2.91897	-3.44298	-2.73449	-2.27375	-2.87687	-2.22541	-3.01308	-2.14746	-3.47904	-3.5284	-2.15937	-3.3144	-3.29824	-2.29102	-2.86856	-2.53626	-3.19479	-2.92861	-3.48238	-3.93806	-3.54193	-4.3048	-3.30248	-3.75489	-4.13461	-2.70107	-2.08758	-1.84396	-3.16589	-3.44427	-4.29646	-3.67131	-2.68317	-3.17143
	0.440629	0.138248	Color2 [A=255, R=169, G=169, B=169]	1	4		P00488	Coagulation factor XIII A chain OS=Homo sapiens OX=9606 GN=F13A1 PE=1 SV=4	-2.27652	-1.35469	-1.33513	-1.1197	-1.57881	-2.23217	-1.76938	-1.43652	-1.93962	-1.82672	-1.30677	-1.53391	-1.62122	-2.11222	-1.20983	-2.04431	-2.63141	-1.84208	-1.71676	-1.99085	-1.95289	-2.33439	-1.8266	-2.1161	-2.17095	-2.30526	-1.26373	-1.41353	-1.54126	-1.33471	-1.58224	-1.41012	-2.42161	-1.75734	-0.933059	-1.1311	-2.67373	-2.45931	-2.78912	-2.22654
	0.69263	-0.451204	Color2 [A=255, R=169, G=169, B=169]	1	4		P04278	Sex hormone-binding globulin OS=Homo sapiens OX=9606 GN=SHBG PE=1 SV=2	-2.28614	-2.40082	-2.28316	-2.51128	-3.90778	-4.83709	-4.83434	-4.68183	-2.79753	-2.51435	-2.00829	-2.66652	-4.06413	-4.76076	-3.12869	-3.4498	-2.17518	-2.53065	-5.02689	-4.57159	-2.80572	-3.27852	-2.42119	-2.05295	-3.71587	-4.2338	-3.45508	-3.33272	-2.6385	-2.74121	-1.32439	-1.39782	-2.37384	-2.26664	-2.48746	-2.67969	-1.91971	-2.46452	-5.32802	-5.4951
	0.30995	-0.209361	Color2 [A=255, R=169, G=169, B=169]	1	4		P01877	Immunoglobulin heavy constant alpha 2 OS=Homo sapiens OX=9606 GN=IGHA2 PE=1 SV=4	-2.34022	-2.66034	1.69618	1.49126	0.499797	0.126624	0.193007	0.447311	0.580732	0.466924	1.28504	1.10571	0.900734	0.916577	0.0433149	-0.379722	-0.845934	-0.714547	-0.31959	-0.226908	1.35581	1.32374	-0.649871	-0.601019	0.635621	0.797922	1.27224	1.00339	1.28713	0.974104	-0.234673	-0.661036	0.036273	-0.028203	0.582673	-0.0276012	-0.290981	-0.488364	0.151616	0.0144014
	0.377715	-0.375592	Color2 [A=255, R=169, G=169, B=169]	1	4		P35579	Myosin-9 OS=Homo sapiens OX=9606 GN=MYH9 PE=1 SV=4	-2.37876	-2.29405	-0.670701	0.696464	-2.4198	-1.74356	-2.54809	-2.63495	-2.68353	-2.45805	-3.09495	-2.01449	-2.49156	-4.21818	-0.801469	-1.8694	-2.85712	-3.48937	-1.58142	-2.90351	-1.84223	-4.38314	-1.7791	-0.515114	-3.21501	-2.93965	-1.57485	1.61275	0.449251	-1.23854	-2.81756	2.08285	-3.09714	-2.67387	-3.07223	-3.12907	-3.58744	-3.54115	-0.77188	-0.911515
	0.178501	-0.0883199	Color2 [A=255, R=169, G=169, B=169]	1	4		P06312	Immunoglobulin kappa variable 4-1 OS=Homo sapiens OX=9606 GN=IGKV4-1 PE=1 SV=1	-2.42387	-2.66501	-0.95527	-1.01087	-1.5761	-1.00126	-1.3005	-1.66831	-1.56648	-1.45437	-3.64392	-3.13467	-2.27265	-2.41277	-1.85764	-2.2042	-1.04029	-1.42791	-2.05104	-1.89707	-1.38063	-0.923999	-2.06832	-2.41081	-1.97535	-2.16472	-1.92005	-2.34907	-0.821253	-1.01488	-1.77048	-1.90311	-2.72012	-2.51027	-1.65809	-1.75221	-1.35704	-1.84993	-1.44708	-1.80039
	0.614328	0.321148	Color2 [A=255, R=169, G=169, B=169]	1	4		P01718	Immunoglobulin lambda variable 3-27 OS=Homo sapiens OX=9606 GN=IGLV3-27 PE=1 SV=2	-2.45119	-2.82963	-2.45548	-2.84694	-1.89262	-1.36854	-2.31435	-2.23082	-1.86864	-1.65492	-4.61261	-3.18522	-2.20234	-2.10193	-2.14711	-2.92969	-1.57778	-1.58005	-4.15491	-3.69316	-1.73971	-1.81157	-3.30638	-3.75172	-2.66619	-2.71429	-2.91256	-3.64124	-1.64415	-1.81257	-3.25483	-1.21629	-3.82429	-4.14669	-2.96103	-3.244	-3.28596	-3.65384	-2.71656	-2.21705
	0.871774	-0.323179	Color2 [A=255, R=169, G=169, B=169]	1	4		A0A075B6R2	Immunoglobulin heavy variable 4-4 OS=Homo sapiens OX=9606 GN=IGHV4-4 PE=3 SV=2	-2.48082	-3.12014	-2.07133	-2.23932	-1.86311	-1.57542	-0.9746	-1.45184	-0.97551	-0.811275	-3.86983	-2.85143	-1.98638	-1.79781	-1.01292	-1.72682	-0.86504	-1.32102	-2.19997	-2.14532	-1.03453	-0.914193	-1.36297	-1.66238	-1.78069	-1.86797	-1.5093	-1.66011	-0.628778	-0.501772	-1.79596	-1.85997	-2.20199	-2.13929	-1.52695	-1.74931	-1.71842	-2.29473	-1.05864	-1.60833
	1.00398	-0.482121	Color2 [A=255, R=169, G=169, B=169]	1	4		P68363	Tubulin alpha-1B chain OS=Homo sapiens OX=9606 GN=TUBA1B PE=1 SV=1	-2.5548	-2.3438	-1.49726	-0.518424	-3.40903	-2.05304	-3.5076	-2.76688	-3.35085	-3.32777	-3.1085	-2.70372	-2.70535	-2.66497	-1.53093	-2.65383	-3.00713	-2.81246	-2.5335	-3.32211	-2.25084	-2.95282	-2.44454	-1.56186	-3.19614	-3.19638	-1.92074	0.00311756	-0.859732	-2.19605	-3.02528	0.547804	-2.6951	-2.62801	-2.67811	-2.4417	-2.78905	-3.05921	-1.62312	-1.76178
	1.53219	0.305948	Color2 [A=255, R=169, G=169, B=169]	1	4		P00740	Coagulation factor IX OS=Homo sapiens OX=9606 GN=F9 PE=1 SV=2	-2.55585	-3.6038	-3.45127	-3.54153	-2.97305	-2.99241	-3.47403	-2.75258	-3.03156	-3.25292	-2.00343	-2.43335	-3.25677	-2.46925	-3.36374	-3.12032	-3.10562	-3.18695	-3.15825	-2.84968	-3.14678	-3.53325	-3.75585	-3.45292	-3.08496	-2.56886	-3.26027	-3.44551	-3.77608	-3.46227	-3.30368	-4.31726	-3.17357	-2.99653	-3.20334	-4.10473	-2.83162	-3.42627	-3.23114	-2.62045
	0.0035279	-0.00110683	Color2 [A=255, R=169, G=169, B=169]	1	4		Q13790	Apolipoprotein F OS=Homo sapiens OX=9606 GN=APOF PE=1 SV=2	-2.75235	-2.82319	-2.45209	-2.87955	-2.90265	-2.92968	-3.1411	-3.53245	-3.08533	-2.75086	-2.82517	-3.0847	-2.81519	-3.15034	-3.18418	-3.37244	-3.19017	-3.09884	-3.40345	-3.24419	-3.15694	-3.73826	-2.57241	-2.76339	-3.49516	-3.4087	-3.22014	-3.28632	-3.02906	-2.87991	-2.67633	-3.85038	-2.76049	-2.95016	-2.35347	-2.60711	-2.83801	-3.21384	-3.25564	-2.54006
	2.40651	0.282145	Color2 [A=255, R=169, G=169, B=169]	1	4		Q16610	Extracellular matrix protein 1 OS=Homo sapiens OX=9606 GN=ECM1 PE=1 SV=2	-2.77535	-2.52754	-3.19973	-3.16933	-2.77765	-2.70448	-3.30639	-3.17684	-2.96563	-2.83362	-2.55187	-2.62747	-2.76791	-3.66924	-2.90457	-2.80306	-2.39582	-2.93406	-2.89345	-2.93782	-3.31876	-3.31365	-3.34317	-3.18296	-3.2025	-2.68946	-3.43501	-3.41611	-3.40449	-3.37813	-3.09032	-3.32709	-2.84903	-3.30702	-3.21479	-3.21582	-2.59902	-2.52821	-3.33026	-3.41894
	0.609852	0.458643	Color2 [A=255, R=169, G=169, B=169]	1	4		P00915	Carbonic anhydrase 1 OS=Homo sapiens OX=9606 GN=CA1 PE=1 SV=2	-3.03128	-5.49978	-4.14984	-3.15395	-5.17836	-2.47413	-2.0141	-4.36884	-3.93797	-3.9841	-4.46439	-3.41876	-3.63101	-0.981421	-4.45109	-4.4605	-5.35142	-3.22252	-0.881495	-4.32614	-5.42568	-2.97086	-4.62352	-3.48739	-5.37778	-4.20106	-3.51325	-2.96507	-4.17445	-4.25672	-5.36721	-4.36847	-5.83176	-3.59496	-3.67829	-4.50778	-4.67151	-5.29465	-2.97399	-0.869578
	0.14807	-0.0611654	Color2 [A=255, R=169, G=169, B=169]	1	4		P61769	Beta-2-microglobulin OS=Homo sapiens OX=9606 GN=B2M PE=1 SV=1	-3.05787	-3.13877	-3.0395	-2.99134	-2.78332	-2.97295	-2.89622	-2.98496	-3.18679	-3.22389	-2.69028	-3.09365	-3.16882	-2.75851	-2.90144	-3.26632	-2.90634	-2.7329	-3.05428	-3.54431	-2.65923	-2.66582	-3.09208	-3.12033	-4.24322	-2.88353	-3.44431	-2.66157	-3.27323	-2.90416	-3.39725	-2.84646	-3.41765	-3.39189	-3.02435	-3.21782	-2.91763	-3.52175	-1.57428	-0.91261
	2.98632	-0.252042	Color2 [A=255, R=169, G=169, B=169]	1	4		O60814	Histone H2B type 1-K OS=Homo sapiens OX=9606 GN=HIST1H2BK PE=1 SV=3	-3.11494	-3.28076	-3.7287	-3.63712	-3.03272	-3.13786	-3.30257	-3.28666	-3.13804	-3.30447	-3.09105	-3.141	-2.58265	-3.13474	-2.8806	-3.66218	-3.32737	-3.29722	-3.39034	-3.16042	-3.1232	-3.02199	-2.87562	-3.03206	-2.91673	-3.04151	-3.0487	-2.51549	-2.77379	-3.05016	-3.18606	-2.82912	-2.79602	-3.28321	-2.84765	-2.85113	-3.04199	-3.12487	-3.07521	-3.15607
	0.136921	0.107696	Color2 [A=255, R=169, G=169, B=169]	1	4		P02741	C-reactive protein OS=Homo sapiens OX=9606 GN=CRP PE=1 SV=1	-3.20426	-3.79163	-5.01156	-4.00001	-4.32265	-4.97573	-2.68981	-2.73284	-2.07911	-3.15332	-3.06878	-3.64932	-4.38643	-3.42124	-3.38484	-3.54015	-5.31678	-3.86956	-4.17722	-3.23167	-4.35634	-3.70498	-5.21313	-2.99243	-4.41426	-2.9769	-4.42553	-4.63413	-3.74463	-2.6258	-3.93026	-3.80762	-5.63832	-4.04743	-4.89035	-4.44879	-3.5285	-3.94683	-1.09113	-1.74347
	1.16822	-0.263085	Color2 [A=255, R=169, G=169, B=169]	1	4		A0A087WSY6	Immunoglobulin kappa variable 3D-15 OS=Homo sapiens OX=9606 GN=IGKV3D-15 PE=3 SV=6	-3.21595	-3.65569	-2.85775	-2.72249	-2.65153	-2.2565	-2.26556	-2.15443	-2.16424	-2.36965	-2.74391	-2.80587	-2.96036	-3.05517	-1.58168	-2.05007	-2.21132	-2.61661	-2.79804	-2.59852	-2.10145	-1.97071	-2.53092	-2.1793	-2.12274	-1.85865	-1.9317	-1.46071	-2.2838	-2.4639	-2.11372	-2.85716	-3.19104	-3.09335	-2.13793	-2.31866	-2.38055	-2.49373	-2.66549	-2.31811
	0.246625	-0.10738	Color2 [A=255, R=169, G=169, B=169]	1	4		P22352	Glutathione peroxidase 3 OS=Homo sapiens OX=9606 GN=GPX3 PE=1 SV=2	-3.25892	-3.39705	-4.15827	-5.08873	-4.18382	-4.03391	-4.92054	-5.21285	-4.13021	-4.71895	-4.00853	-3.18481	-3.59617	-3.45381	-4.38663	-4.60273	-4.33724	-4.14082	-3.67987	-4.34856	-4.25844	-5.64322	-3.15168	-3.92814	-4.49959	-4.49861	-3.40847	-3.76721	-3.6196	-4.28271	-3.79285	-4.37615	-3.96847	-3.58188	-3.67491	-4.20993	-3.8314	-3.3013	-4.94503	-3.95524
	0.837297	-0.455824	Color2 [A=255, R=169, G=169, B=169]	1	4		P01602	Immunoglobulin kappa variable 1-5 OS=Homo sapiens OX=9606 GN=IGKV1-5 PE=1 SV=2	-3.35835	-3.80516	-1.87721	-1.77031	-1.44838	-1.14357	-1.1823	-1.39328	-1.75628	-1.80988	-3.84151	-3.67896	-4.8973	-5.2325	-1.36041	-1.66041	-1.07637	-1.46409	-1.73179	-1.42008	-1.55022	-1.27975	-1.53083	-1.77487	-1.73785	-1.96308	-1.83713	-2.1192	-1.43979	-1.60039	-1.64039	-1.83995	-2.69046	-2.72556	-1.87674	-1.94832	-1.92312	-2.41276	-1.44749	-1.45374
	0.0309263	-0.0125068	Color2 [A=255, R=169, G=169, B=169]	1	4		P18428	Lipopolysaccharide-binding protein OS=Homo sapiens OX=9606 GN=LBP PE=1 SV=3	-3.3596	-3.6059	-2.99243	-3.39359	-2.82011	-3.05696	-3.20862	-2.89417	-3.27201	-3.27803	-3.53948	-4.02429	-4.52435	-4.16184	-3.22757	-3.57741	-3.56215	-3.43301	-3.76985	-3.99829	-2.75977	-3.48674	-2.98679	-3.16808	-3.58456	-3.31386	-3.25319	-4.11493	-4.21473	-3.15595	-3.59003	-3.70704	-3.10091	-2.96081	-3.6424	-4.06762	-2.85849	-3.19307	-4.19791	-4.09261
	1.49557	-0.378603	Color2 [A=255, R=169, G=169, B=169]	1	4		A0A075B6I9	Immunoglobulin lambda variable 7-46 OS=Homo sapiens OX=9606 GN=IGLV7-46 PE=3 SV=4	-3.36904	-3.72555	-2.32817	-2.67229	-1.88186	-2.14263	-2.35394	-2.49451	-2.26345	-2.51333	-2.46896	-2.17081	-2.86942	-3.0394	-2.64955	-3.15832	-2.68604	-2.57522	-3.29239	-3.45392	-2.29729	-2.05597	-2.8949	-2.6888	-2.304	-2.19248	-1.39935	-1.63731	-2.00625	-1.73854	-2.01056	-2.51555	-3.6336	-3.70756	-2.00419	-2.33008	-2.20601	-2.61547	-2.09218	-2.20664
	0.122484	-0.0397443	Color2 [A=255, R=169, G=169, B=169]	1	4		Q12805	EGF-containing fibulin-like extracellular matrix protein 1 OS=Homo sapiens OX=9606 GN=EFEMP1 PE=1 SV=2	-3.41022	-2.86846	-4.24054	-3.94062	-3.54119	-3.75692	-3.72929	-3.79695	-3.9036	-3.72418	-3.10724	-3.35777	-3.4977	-4.12989	-3.63523	-4.05181	-3.07795	-4.21133	-3.44896	-3.92246	-4.04202	-3.7834	-3.38778	-3.31537	-3.51584	-3.96457	-4.19637	-3.80263	-3.2197	-2.98179	-3.52286	-4.49029	-3.18239	-3.64272	-3.38808	-4.29177	-3.47092	-3.88722	-3.19409	-3.2776
	1.61028	-0.567707	Color2 [A=255, R=169, G=169, B=169]	1	4		P01703	Immunoglobulin lambda variable 1-40 OS=Homo sapiens OX=9606 GN=IGLV1-40 PE=1 SV=2	-3.56609	-3.82481	-3.51726	-3.6878	-4.51715	-4.71969	-4.21661	-4.09028	-2.19921	-2.0023	-4.5577	-4.35955	-5.06437	-5.71488	-4.22114	-4.14826	-4.3748	-4.18223	-4.77831	-4.84881	-2.89073	-3.08038	-3.2972	-3.44898	-4.03155	-4.05845	-3.4528	-3.54847	-3.6373	-3.95411	-3.58835	-4.19834	-4.0527	-4.29425	-1.84228	-2.27729	-3.57154	-4.29992	-4.00883	-3.70361
	0.830503	0.534579	Color2 [A=255, R=169, G=169, B=169]	1	4		P01880	Immunoglobulin heavy constant delta OS=Homo sapiens OX=9606 GN=IGHD PE=1 SV=3	-3.70364	-3.85935	-2.16861	-2.3755	-2.01874	-2.79979	-2.12457	-2.25894	-2.10876	-2.16275	-0.404475	-0.287976	-3.62456	-4.24141	-2.21032	-2.82093	-4.17212	-4.68928	-0.0522308	-0.389774	-2.23199	-2.55542	-3.6583	-3.02452	-3.08875	-3.59501	-2.32932	-2.46194	-1.8487	-1.36069	-2.88253	-3.28021	-3.8214	-3.69992	-3.36227	-4.24257	-4.20044	-3.75505	-2.10806	-1.65823
	0.675974	-0.6851	Color2 [A=255, R=169, G=169, B=169]	1	4		Q9Y490	Talin-1 OS=Homo sapiens OX=9606 GN=TLN1 PE=1 SV=3	-3.73083	0.288148	0.791984	1.4776	-3.97519	0.0834341	-1.17323	0.234276	-1.73993	-0.751283	-0.376073	0.363505	-0.735493	-2.2765	0.855662	0.604144	-7.60405	0.00119877	0.586512	-0.371153	0.414344	-0.292949	-0.0195341	0.74741	-1.22648	-1.81614	-0.162939	1.18302	0.610456	0.369698	-0.562525	1.60256	-1.10159	0.506688	-1.5981	1.06013	-2.18395	-1.60897	0.146688	0.186931
	0.951995	-0.282849	Color2 [A=255, R=169, G=169, B=169]	1	4		A0A0C4DH69	Immunoglobulin kappa variable 1-9 OS=Homo sapiens OX=9606 GN=IGKV1-9 PE=3 SV=1	-3.74119	-4.32214	-3.25704	-3.93595	-3.5828	-3.18006	-2.66883	-2.62432	-2.80658	-2.33904	-2.93358	-3.06382	-2.33532	-2.68486	-2.93889	-3.00841	-1.99076	-2.54895	-3.33188	-3.14952	-2.94774	-2.97022	-2.59672	-2.98681	-2.00021	-3.6338	-2.5669	-2.56301	-2.78406	-2.98916	-2.37757	-3.1249	-3.38838	-3.88133	-1.97824	-2.37319	-2.17093	-2.65203	-2.78891	-2.01285
	0.593752	-0.249077	Color2 [A=255, R=169, G=169, B=169]	1	4		A0A075B6K4	Immunoglobulin lambda variable 3-10 OS=Homo sapiens OX=9606 GN=IGLV3-10 PE=3 SV=2	-3.76739	-4.26042	-2.65674	-2.76699	-2.24723	-2.39165	-1.92337	-2.19214	-2.54292	-2.48431	-3.20673	-3.02853	-2.63178	-2.4754	-1.50867	-1.80754	-1.284	-1.33582	-3.51149	-2.98775	-2.00997	-1.8867	-2.60606	-2.93591	-2.35177	-2.38007	-2.42844	-2.63155	-1.19496	-1.6724	-2.32309	-1.56794	-3.2147	-3.48949	-2.26641	-2.60609	-2.25473	-2.60814	-1.95015	-1.65077
	0.913669	-0.285635	Color2 [A=255, R=169, G=169, B=169]	1	4		P01782	Immunoglobulin heavy variable 3-9 OS=Homo sapiens OX=9606 GN=IGHV3-9 PE=1 SV=2	-3.77637	-1.16565	-0.362266	-0.407493	-2.09656	-1.36482	-1.95981	-1.32913	-1.49967	-1.24599	-1.41679	-1.19843	-1.0254	-1.71772	-2.07103	-1.58191	-2.25186	-1.25654	-1.72418	-1.83809	-0.63503	-0.719748	-1.08219	-0.875616	-1.56412	-1.65365	-1.59034	-1.4097	-1.23006	-1.10141	-1.36937	-1.73182	-1.68554	-0.850455	-1.24321	-0.75832	-1.52354	-1.76917	-1.56892	-1.21482
	0.315734	0.0734656	Color2 [A=255, R=169, G=169, B=169]	1	4		P00742	Coagulation factor X OS=Homo sapiens OX=9606 GN=F10 PE=1 SV=2	-3.83078	-4.08242	-4.2058	-4.39681	-3.92699	-3.84156	-4.73311	-4.03138	-4.58093	-3.96688	-4.73431	-4.06193	-3.69225	-4.60729	-4.41776	-3.97096	-4.22903	-4.2627	-4.40922	-4.13705	-4.24736	-4.02715	-4.67707	-4.7932	-3.9426	-4.12941	-4.29334	-4.25996	-4.77864	-5.05725	-3.86046	-4.3423	-4.2225	-3.82742	-3.91947	-4.13816	-4.10159	-4.73684	-4.14421	-4.08955
	0.441358	0.185367	Color2 [A=255, R=169, G=169, B=169]	1	4		Q04756	Hepatocyte growth factor activator OS=Homo sapiens OX=9606 GN=HGFAC PE=1 SV=1	-3.95804	-4.01907	-3.66634	-4.07299	-3.58849	-4.1903	-4.66051	-4.0758	-4.52756	-2.53291	-3.66232	-3.51848	-3.59453	-5.03188	-3.40015	-3.56052	-3.82761	-3.72466	-3.64349	-3.66778	-4.18051	-3.82211	-4.0688	-4.72989	-3.01497	-3.76761	-3.89461	-2.49822	-2.98186	-3.98504	-5.24924	-4.69137	-4.46666	-3.75566	-4.44486	-4.77733	-3.87738	-5.10119	-4.23398	-3.08948
	1.22774	0.299437	Color2 [A=255, R=169, G=169, B=169]	1	4		Q9UK55	Protein Z-dependent protease inhibitor OS=Homo sapiens OX=9606 GN=SERPINA10 PE=1 SV=1	-3.98867	-4.31468	-4.06449	-4.94182	-4.55134	-5.26784	-4.01346	-4.12863	-4.36442	-4.25693	-3.83594	-3.72043	-4.09723	-4.40526	-4.23752	-4.58915	-4.45088	-4.81111	-4.31943	-5.46102	-4.47306	-6.10142	-4.68001	-4.24362	-4.6786	-4.17639	-4.21724	-5.07926	-4.69634	-4.6571	-4.51467	-5.51261	-4.45183	-4.33314	-4.47055	-4.67232	-4.12005	-4.14654	-5.25846	-5.32577
	1.46456	-0.402076	Color2 [A=255, R=169, G=169, B=169]	1	4		P01599	Immunoglobulin kappa variable 1-17 OS=Homo sapiens OX=9606 GN=IGKV1-17 PE=1 SV=2	-4.18266	-4.19126	-2.9471	-2.89881	-3.02142	-3.17696	-3.43802	-3.20162	-2.07604	-1.91037	-4.09977	-3.80723	-4.10571	-4.90191	-3.1166	-2.81545	-2.97029	-3.26015	-3.55689	-3.42141	-2.95507	-3.2903	-3.42202	-3.3305	-2.94893	-3.45603	-2.95933	-3.05346	-2.28708	-2.82995	-2.49272	-3.27165	-3.51623	-3.31661	-2.69076	-2.8362	-2.41755	-2.45928	-3.06089	-2.4636
	0.228502	-0.107899	Color2 [A=255, R=169, G=169, B=169]	1	4		A0A0C4DH25	Immunoglobulin kappa variable 3D-20 OS=Homo sapiens OX=9606 GN=IGKV3D-20 PE=3 SV=1	-4.40452	-5.05625	-2.59782	-2.5472	-3.02828	-2.67342	-3.45922	-3.72721	-2.25872	-2.07937	-4.06639	-3.53842	-3.88325	-3.89316	-3.24393	-3.70331	-3.48642	-4.18704	-4.0854	-4.21251	-3.27388	-3.12943	-3.55302	-3.62721	-2.96183	-2.67563	-3.11684	-3.22913	-2.95094	-3.17803	-2.89861	-4.00791	-3.93806	-4.01811	-2.91917	-3.66751	-4.05344	-3.86729	-3.57978	-3.32802
	0.974611	-0.399561	Color2 [A=255, R=169, G=169, B=169]	1	4		A0A0A0MS15	Immunoglobulin heavy variable 3-49 OS=Homo sapiens OX=9606 GN=IGHV3-49 PE=3 SV=1	-4.54219	-5.46107	-4.14109	-4.40456	-3.67384	-3.60091	-2.88053	-2.9948	-3.35369	-3.41669	-3.01448	-3.26301	-2.98682	-3.22678	-4.55655	-4.2073	-1.98476	-2.27366	-4.15876	-4.15865	-2.39506	-2.65714	-2.72181	-3.16996	-3.95197	-4.09205	-3.69745	-4.64648	-2.98365	-2.74644	-2.61981	-1.80909	-3.82807	-3.79769	-3.4848	-3.64549	-3.13144	-2.90798	-3.12806	-2.89443
	0.0710198	0.020941	Color2 [A=255, R=169, G=169, B=169]	1	4		P48740	Mannan-binding lectin serine protease 1 OS=Homo sapiens OX=9606 GN=MASP1 PE=1 SV=3	-4.58733	-4.81772	-4.93863	-5.49391	-4.58915	-5.15233	-5.0671	-4.75992	-4.91808	-5.44389	-5.25339	-4.98196	-4.46008	-5.33447	-5.39447	-5.16116	-5.12864	-5.3328	-4.91579	-5.0771	-5.00933	-5.03576	-5.06633	-4.94914	-4.74015	-4.41502	-5.01179	-4.95203	-5.73693	-5.91941	-4.71607	-5.37232	-5.41603	-4.66879	-4.79955	-5.00808	-4.70977	-4.78714	-5.62188	-5.29122
	1.22419	-0.285687	Color2 [A=255, R=169, G=169, B=169]	1	4		P62805	Histone H4 OS=Homo sapiens OX=9606 GN=HIST1H4A PE=1 SV=2	-4.65699	-5.29635	-5.68218	-5.62377	-5.01655	-5.27928	-4.80962	-5.23118	-5.51212	-5.64016	-4.66352	-4.74393	-4.02086	-5.33079	-4.71202	-5.15572	-4.89851	-4.68636	-5.44832	-4.78743	-5.07439	-4.90006	-5.10044	-5.00978	-4.83654	-5.28727	-4.73374	-3.36474	-4.49398	-4.70179	-5.22947	-3.87453	-4.55527	-5.27642	-4.85734	-5.2127	-4.99722	-5.18391	-4.57868	-4.21367
	0.220578	-0.058099	Color2 [A=255, R=169, G=169, B=169]	1	4		P55058	Phospholipid transfer protein OS=Homo sapiens OX=9606 GN=PLTP PE=1 SV=1	-4.65965	-4.84456	-5.53567	-5.88436	-5.57358	-5.84529	-5.58101	-5.51787	-5.5588	-5.96224	-5.00672	-5.56053	-5.26706	-5.34881	-5.89862	-5.29016	-5.50327	-6.00618	-5.6537	-5.12763	-6.19714	-5.90119	-5.20415	-5.68633	-5.59408	-5.21342	-5.1684	-5.56813	-5.09716	-5.28939	-5.14268	-5.90756	-5.39818	-5.19548	-5.15825	-5.49507	-4.89419	-5.29944	-5.71845	-5.33505
	0.555222	-0.649328	Color2 [A=255, R=169, G=169, B=169]	1	4		P21333	Filamin-A OS=Homo sapiens OX=9606 GN=FLNA PE=1 SV=4	-4.90846	-2.23746	0.107825	1.26024	-3.93041	-0.403762	-3.28981	-1.96287	-4.67974	-3.37062	-1.91959	-0.798533	-2.60751	-3.37417	-0.0118761	-0.782792	-4.20311	-2.38765	-1.07045	-2.39893	-0.297587	-3.23159	-0.856256	0.0647087	-3.95089	-4.15346	-1.16809	1.58563	0.834499	-0.605553	-2.01052	2.34647	-3.19724	-1.42866	-4.07935	-1.02611	-4.75687	-3.26323	-0.352405	-0.436595
	0.591901	-0.419824	Color2 [A=255, R=169, G=169, B=169]	1	4		P67936	Tropomyosin alpha-4 chain OS=Homo sapiens OX=9606 GN=TPM4 PE=1 SV=3	-5.07677	-1.18176	-1.12689	-0.569985	-3.80827	-1.54812	-2.52614	-1.04438	-3.08564	-1.8838	-1.27404	-1.05113	-1.82502	-3.25212	-1.00142	-1.32205	-5.60231	-1.47068	-1.12432	-1.92189	-1.2764	-1.72094	-1.62509	-0.739527	-2.86182	-2.93574	-1.63583	-0.766332	-1.05105	-1.2263	-2.2038	-0.523109	-2.26585	-1.14351	-2.05579	-0.392153	-3.12242	-2.89005	-1.43642	-1.4281
	0.428432	-0.100957	Color2 [A=255, R=169, G=169, B=169]	1	4		P62937	Peptidyl-prolyl cis-trans isomerase A OS=Homo sapiens OX=9606 GN=PPIA PE=1 SV=2	-5.12895	-4.41013	-4.41346	-4.35116	-5.18403	-4.62973	-4.97618	-4.49002	-4.95503	-4.54842	-4.4481	-4.27367	-4.2838	-4.9617	-4.31803	-4.4022	-5.65851	-4.35169	-4.63675	-4.81493	-4.64296	-4.56615	-4.52434	-4.29763	-4.68889	-5.03362	-4.7277	-4.80388	-4.58511	-4.5229	-4.74749	-4.31085	-4.68955	-4.12888	-4.27695	-3.54005	-4.77526	-4.99507	-4.71118	-4.64887
	0.0881647	-0.0536819	Color2 [A=255, R=169, G=169, B=169]	1	4		P07195	L-lactate dehydrogenase B chain OS=Homo sapiens OX=9606 GN=LDHB PE=1 SV=2	-5.40093	-3.87058	-3.91985	-3.68264	-6.2975	-3.9327	-4.65255	-4.06358	-5.0165	-4.59382	-4.45563	-4.17489	-3.98443	-4.59992	-3.73937	-4.08838	-5.90072	-3.91278	-3.72609	-4.83538	-4.17033	-4.35672	-3.79344	-3.81647	-4.85391	-4.77538	-4.43052	-4.42874	-3.82881	-3.82311	-4.53447	-6.72191	-4.7797	-3.36157	-4.18542	-3.57955	-4.64524	-5.07643	-4.38836	-4.22451
	0.587815	-0.41846	Color2 [A=255, R=169, G=169, B=169]	1	4		P37802	Transgelin-2 OS=Homo sapiens OX=9606 GN=TAGLN2 PE=1 SV=3	-5.84907	-1.4664	-1.44752	-1.23448	-4.42277	-2.07233	-2.97757	-1.65279	-3.1638	-2.72394	-1.89954	-1.34651	-1.80933	-3.72963	-1.64243	-1.54163	-6.41709	-1.59798	-1.57192	-2.55995	-1.60095	-1.81476	-2.11688	-1.29972	-3.09646	-3.25558	-2.73775	-2.45001	-1.88365	-1.58646	-2.23763	-1.86293	-2.36113	-1.4205	-2.16651	-0.781822	-2.90419	-3.00502	-2.13596	-2.03957
	0.0771916	-0.0670768	Color2 [A=255, R=169, G=169, B=169]	1	4		P23528	Cofilin-1 OS=Homo sapiens OX=9606 GN=CFL1 PE=1 SV=3	-6.0473	-1.07777	-1.24403	-0.888535	-1.42399	-1.29411	-1.74387	-1.21273	-1.42716	-1.46134	-1.45648	-0.991155	-0.934135	-0.8226	-0.659404	-0.307702	-1.94102	-0.496217	-1.46677	-1.18023	-0.587668	-1.03525	-1.38513	-0.766747	-0.985883	-0.955322	-1.42447	-1.66712	-1.25426	-1.11891	-1.24648	-1.03784	-1.85959	-1.02237	-0.842656	-0.459074	-3.77558	-3.43954	-0.412187	-1.45892
	1.49144	-0.345916	Color2 [A=255, R=169, G=169, B=169]	1	4		P68431	Histone H3.1 OS=Homo sapiens OX=9606 GN=HIST1H3A PE=1 SV=2	-6.48069	-5.52789	-6.57548	-6.45193	-5.77354	-6.28276	-6.85686	-5.56395	-6.44265	-6.33692	-6.13172	-6.11309	-5.9583	-6.81951	-5.98044	-6.44096	-6.34083	-6.28188	-6.1709	-5.64704	-6.25662	-6.29937	-6.17437	-5.45907	-5.83531	-6.4417	-6.29464	-4.49122	-5.3298	-5.98069	-6.12026	-5.12666	-5.99478	-6.56913	-6.4207	-5.32332	-6.0369	-6.43029	-5.85371	-4.82048
	0.454877	0.1439	Color2 [A=255, R=169, G=169, B=169]	1	4		P13796	Plastin-2 OS=Homo sapiens OX=9606 GN=LCP1 PE=1 SV=6	-6.92352	-6.17472	-7.00103	-7.09929	-6.78232	-7.52402	-7.13471	-6.26348	-6.32126	-6.12511	-5.75384	-5.53202	-5.90293	-5.46776	-6.07902	-6.23168	-6.68523	-6.85768	-6.15771	-6.92229	-6.07982	-6.83365	-6.73412	-5.99816	-6.965	-6.22745	-6.7231	-6.51681	-6.48214	-6.00945	-6.91242	-7.10348	-7.15247	-6.79723	-6.62027	-5.94965	-6.47006	-6.88485	-6.74428	-6.6132
	0.434912	-0.393745	Color2 [A=255, R=169, G=169, B=169]	1	4		P12814	Alpha-actinin-1 OS=Homo sapiens OX=9606 GN=ACTN1 PE=1 SV=2	-7.03471	-1.41661	-1.6028	-0.298354	-5.01364	-1.60729	-2.88146	-1.85754	-3.31389	-2.40456	-2.17463	-1.74477	-2.76468	-3.06348	-1.36691	-2.29774	-4.13553	-2.34666	-1.53951	-2.22684	-1.50527	-2.92879	-1.59273	-0.978931	-4.60238	-3.47484	-2.28677	-0.517873	-1.4126	-1.77851	-2.51634	0.252525	-3.24086	-2.35658	-2.74556	-1.19536	-4.39016	-3.00249	-1.2292	-1.71401
	0.590568	-0.635802	Color2 [A=255, R=169, G=169, B=169]	1	4		P18206	Vinculin OS=Homo sapiens OX=9606 GN=VCL PE=1 SV=4	-8.16951	-2.71093	-2.34609	-1.72263	-7.01733	-3.40283	-3.95698	-2.20657	-4.27287	-2.92636	-2.76875	-2.40773	-3.09567	-6.74783	-2.42657	-2.51044	-9.14569	-2.42327	-2.22148	-3.25455	-2.46925	-3.51643	-3.00436	-2.39015	-4.0615	-6.31336	-2.93232	-2.28283	-2.68585	-2.66516	-2.65755	-1.67241	-3.65062	-2.40903	-3.53472	-1.00453	-4.23251	-5.02701	-3.48206	-3.02634

## Sheet: Table S7
Biological Pathway
Category	Term	Count	%	PValue	Genes	Bonferroni	Benjamini	FDR
GOTERM_BP_DIRECT	GO:0050871~positive regulation of B cell activation	8	42.1053	1.69553e-16	P01859, B9A064, P01857, P01834, P01876, A0M8Q6, P0DOY2, P01871	3.55271e-14	2.43865e-14	2.04237e-14
GOTERM_BP_DIRECT	GO:0006910~phagocytosis, recognition	8	42.1053	3.04831e-16	P01859, B9A064, P01857, P01834, P01876, A0M8Q6, P0DOY2, P01871	5.32907e-14	2.43865e-14	2.04237e-14
GOTERM_BP_DIRECT	GO:0006958~complement activation, classical pathway	8	42.1053	3.69879e-12	P01859, B9A064, P01857, P01834, P01876, A0M8Q6, P0DOY2, P01871	5.91811e-10	1.16004e-10	9.71533e-11
GOTERM_BP_DIRECT	GO:0045087~innate immune response	9	47.3684	3.44135e-09	P01859, B9A064, P01857, P01834, P01876, A0M8Q6, P0DOY2, P02675, P01871	5.50616e-07	7.86595e-08	6.58773e-08
GOTERM_BP_DIRECT	GO:0002576~platelet degranulation	6	31.5789	4.59503e-08	P04217, P02768, P02647, P02787, P02675, P01023	7.35201e-06	8.16893e-07	6.84148e-07
Cellular Component
Category	Term	Count	%	PValue	Genes	Bonferroni	Benjamini	FDR
GOTERM_CC_DIRECT	GO:0072562~blood microparticle	18	94.7368	1.82047e-36	P02790, P04217, B9A064, A0M8Q6, P0DOY2, P00738, P00739, P01859, P01857, P01834, P02647, P02768, P01876, P02787, P02675, P02652, P01871, P01023	9.28441e-35	9.28441e-35	7.46394e-35
GOTERM_CC_DIRECT	GO:0005576~extracellular region	16	84.2105	1.68462e-14	P02790, P04217, A0M8Q6, P0DOY2, P00738, P00739, P01859, P01857, P01834, P02647, P02768, P01876, P02787, P02675, P02652, P01023	8.60645e-13	4.29578e-13	3.45347e-13
GOTERM_CC_DIRECT	GO:0070062~extracellular exosome	17	89.4737	1.44027e-12	P02790, P04217, B9A064, P0DOY2, P00738, P00739, P01859, P01857, P01834, P02647, P02768, P01876, P02787, P02675, P02652, P01871, P01023	7.34549e-11	2.44847e-11	1.96838e-11
GOTERM_CC_DIRECT	GO:0009897~external side of plasma membrane	9	47.3684	6.78084e-12	P01859, B9A064, P01857, P01834, P01876, A0M8Q6, P0DOY2, P02675, P01871	3.45821e-10	6.91646e-11	5.56029e-11
GOTERM_CC_DIRECT	GO:0005615~extracellular space	13	68.4211	1.10778e-10	P02790, P04217, P0DOY2, P00738, P01859, P01857, P01834, P02647, P02768, P01876, P02787, P02675, P01871	5.64966e-09	9.4161e-10	7.56981e-10
Molecular Function
Category	Term	Count	%	PValue	Genes	Bonferroni	Benjamini	FDR
GOTERM_MF_DIRECT	GO:0034987~immunoglobulin receptor binding	8	42.1053	9.62274e-17	P01859, B9A064, P01857, P01834, P01876, A0M8Q6, P0DOY2, P01871	5.9952e-15	5.19628e-15	4.33023e-15
GOTERM_MF_DIRECT	GO:0003823~antigen binding	8	42.1053	2.7994e-12	P01859, B9A064, P01857, P01834, P01876, A0M8Q6, P0DOY2, P01871	1.51169e-10	7.55837e-11	6.29864e-11
GOTERM_MF_DIRECT	GO:0004252~serine-type endopeptidase activity	7	36.8421	7.90325e-08	P00738, P00739, P01859, P01857, P01834, A0M8Q6, P0DOY2	4.26775e-06	1.42259e-06	1.18549e-06
GOTERM_MF_DIRECT	GO:0031210~phosphatidylcholine binding	3	15.7895	0.000210629	P02647, P02652, P01871	0.0113107	0.00284349	0.00236958
GOTERM_MF_DIRECT	GO:0034190~apolipoprotein receptor binding	2	10.5263	0.00284091	P02647, P02652	0.142408	0.0255682	0.0213068
Disease
Category	Term	Count	%	PValue	Genes	Bonferroni	Benjamini	FDR
Category	Term	Count	%	PValue	Genes	Bonferroni	Benjamini	FDR
GAD_DISEASE	Type 2 Diabetes| edema | rosiglitazone	8	42.1053	0.00263396	P00738, P00739, P02790, P02647, P02787, P02675, P02652, P01023	0.60792	0.279305	0.273797
GAD_DISEASE	Type 2 diabetes	4	21.0526	0.00492924	P00738, P02647, P02675, P02652	0.826956	0.279305	0.273797
GAD_DISEASE	atherosclerosis, coronary	3	15.7895	0.0101506	P00738, P02647, P02675	0.973267	0.300288	0.294366
